# Supplementary material for: Assessing long-term tephra fallout hazard in Southern Italy from Neapolitan volcanoes
Source: Copernicus journal article supplement (doi:10.5194/nhess-2023-3), 2023-02-22
Supplement: Supplementary file [file nhess-2023-3-RC2-supplement.pdf]

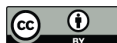

# Assessing long-term tephra fallout hazard in Southern Italy from Neapolitan volcanoes

Silvia Massaro<sup>1,2</sup>, Manuel Stocchi<sup>1,2</sup>, Beatriz Martínez Montesinos<sup>2</sup>, Laura Sandri<sup>2</sup>, Jacopo Selva<sup>2,3</sup>, Roberto Sulpizio<sup>1,2,4</sup>, Biagio Giaccio<sup>4</sup>, Massimiliano Moscatelli<sup>4</sup>, Edoardo Peronace<sup>4</sup>, Marco Nocentini<sup>4,5</sup>, Roberto Isaia<sup>6</sup>, Manuel Titos Luzón<sup>7</sup>, Pierfrancesco Dellino<sup>1</sup>, Giuseppe Naso<sup>8</sup>, and Antonio Costa<sup>2</sup>

<sup>1</sup>Dipartimento di Scienze della Terra e Geoambientali, Università degli Studi di Bari, Italy

<sup>2</sup>Istituto Nazionale di Geofisica e Vulcanologia, Sezione di Bologna, Italy

<sup>3</sup>Dipartimento di Scienze della Terra, dell'Ambiente e delle Risorse, Università Federico II, Napoli, Italy

<sup>4</sup>Istituto di Geologia Ambientale e Geoingegneria, Consiglio Nazionale delle Ricerche, Roma, Italy

<sup>5</sup>Dipartimento Servizio Geologico d'Italia, Istituto Superiore per la Protezione e Ricerca Ambientale, Rome, Italy

<sup>6</sup>Istituto Nazionale di Geofisica e Vulcanologia, Osservatorio Vesuviano, Napoli, Italy

<sup>7</sup>Signal Processing and Machine Learning, University of Granada, Spain

<sup>8</sup>Dipartimento di Protezione Civile, Rome, Italy

**Correspondence:** Silvia Massaro (silvia.massaro@uniba.it)

**Abstract.** Nowadays, modelling of tephra fallout hazard is coupled with probabilistic analysis that takes into account the natural variability of the volcanic phenomena in terms of eruption probability, eruption sizes, vent position and meteorological conditions. In this framework, we present a prototypical methodology to carry out the long-term tephra fallout hazard assessment in Southern Italy from the active Neapolitan volcanoes: Somma-Vesuvius, Campi Flegrei, and *Ischia*.

5 FALL3D model (v.8.0) has been used to run thousands of numerical simulations (1500 per eruption size class), considering the ECMWF ERA5 meteorological dataset over the last 30 years. The output in terms of tephra ground load has been processed within a new workflow for large-scale, high-resolution volcanic hazard assessment relying on a Bayesian procedure, in order to provide the mean annual frequency with which the tephra load at the ground exceeds given critical thresholds at a target site within a 50-years exposure time. Our results are expressed in terms of absolute mean hazard maps considering different levels

10 of aggregation, from the impact of each volcanic source and eruption size class to the quantification of the total hazard. This work provides, for the first time, a multi-volcano probabilistic hazard assessment posed by tephra fallout, comparable with those used for seismic phenomena and other natural disasters. This methodology can be applied to any other volcanic areas or over different exposure times allowing to account for the eruptive history of the target volcanoes that, when available, could include the occurrence of less frequent large eruptions representing critical elements for risk evaluations.

## 15 1 Introduction

Volcanic eruptions produce a large variety of hazards which widely span spatial distribution and impacts on environment and society. The most frequent and widespread one is tephra fallout, occurring in more than 90% of all eruptions (e.g. Newhall and Hobbitt, 2002; Jenkins et al., 2015). Although large explosive eruptions impacting populated areas are relatively infrequent, the



tephra fallout can result in considerable direct and indirect impacts on society, which are a function of the hazards, exposure  
20 of assets and living beings and vulnerability of the critical infrastructure (e.g. Spence et al., 2005; Menoni et al., 2012; Wilson  
et al., 2012, 2017; Jenkins et al., 2015). The effects of tephra dispersal and deposition vary according to the size of the eruption,  
the distance from the vent, the occurrence of aggregation phenomena, and the wind field at the time of the eruption. Lapilli  
mostly fall from the buoyant plume within tens of kilometers while ash travels much further, draping the landscape sometimes  
with ephemeral deposits that can be remobilized long after the eruption due to resuspension by winds and possible generation of  
25 volcanoclastic flows (e.g. Blong, 1984; Sulpizio et al., 2006; Alderton and Elias, 2020). Load from tephra deposits may generate  
structural damages to buildings (e.g. Spence et al., 2005; Costa et al., 2009; Mingari et al., 2022), disrupt infrastructures (roads,  
rails, power lines, etc.; e.g. Swords-Daniels, 2011; Wilson et al., 2012; Jenkins et al., 2015) and impinge on agriculture and  
livestock (e.g. Blong, 1984; Wilson et al., 2012; Sulpizio et al., 2014; Loughlin et al., 2015). The injection of large amount of  
ash particles into the atmosphere may also alter climatic conditions (e.g. Rampino and Self, 2000) and strongly affect aviation  
30 safety (e.g. Casadevall, 1994; Miller and J., 2000; Sulpizio et al., 2012; Biass et al., 2014), leading to heavy economic loss (e.g.  
Folch and Sulpizio, 2010; Tesche et al., 2012; Wilson et al., 2014, 2017; Bonadonna et al., 2021).

Volcanoes are intrinsically multi-hazard and risk, with potential significant interaction among the different phenomena and/or  
damaging mechanisms (Zuccaro et al., 2013; Selva, 2022). Forecasting type and size of the next eruption from a given volcano  
can be achieved only statistically through a probabilistic quantification based on past eruptive activity, analogue volcanoes, and  
35 other geological information, and should account for the natural variability of physico-chemical processes and for the potential  
scarcity of data, as well as the limited knowledge of volcanic systems and their processes (e.g. Marzocchi and Bebbington,  
2012; Selva et al., 2018). Such an approach sustains the so called Probabilistic Volcanic Hazard Assessment (PVHA) method  
based on Bayesian procedures for transforming the whole volcanological information into probability distributions allowing  
aleatory and epistemic uncertainties to be properly accounted for (e.g. Marzocchi et al., 2004, 2007, 2010). In the case of  
40 tephra fallout, the main uncertainties are due to the high variability in eruptive source parameters (e.g. total erupted mass, mass  
eruption rate, time duration, vent position, total grain size distribution) and meteorological conditions. Marzocchi et al. (2010)  
presented a Bayesian Event Tree workflow (BET\_VH) to calculate the probability of any kind of long-term volcanic hazard  
from a general prior event to subsequent events, weighting each one with its own probability of occurrence. Input incorporates  
results from numerical simulations aimed to explore the potential impact of the volcanic phenomena over a selected area,  
45 while output is in the form of hazard maps showing the probabilities associated with exceeding critical hazard thresholds at  
given locations. Such BET (Bayesian Event Tree) models have been largely used to assess both long- and short-term hazard  
assessments (e.g. Selva et al., 2010; Sandri et al., 2012, 2014; Selva et al., 2014; Thompson and Lindsay, 2015; Constantinescu  
et al., 2016), extending the output to Bayesian hazard curves (Tonini et al., 2015).

PVHA is often computed for single volcanoes. On the contrary, in many other fields, the hazard is computed integrating over  
50 all the potential sources, as the interest is not in the source (probability of an earthquake), but in the occurrence of the dangerous  
phenomenon (e.g., ground shaking) from whatever source (e.g. Cornell, 1968). In volcanology, this is complicated by the fact  
that volcanic systems may be very different to each other and may experience different phases of activity, complicating the  
potential homogeneous integration of different volcanoes in the same hazard quantification (Selva et al., 2022). To this end,

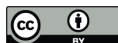

55 some studies applied methodologies to rank multiple volcanoes according to their hazards (e.g. Aspinall et al., 2011; Auker et al., 2015) or their population exposure (e.g. Small and Naumann, 2001; Freire et al., 2019). Jenkins et al. (2022) quantified and ranked exposure to multiple volcanic hazards for 40 volcanoes in southeast Asia, showing which of these volcanoes may have been overlooked because not frequently (or recently) active but with the potential to affect large numbers of people and assets.

The Neapolitan area represents one of the highest volcanic risk areas in the world due to the presence of three active and potentially explosive volcanoes and the extremely high exposure (over 3 million people living in the metropolitan area; <https://www.cittametropolitana.na.it/>). Previous studies assessed tephra fall hazard from Neapolitan volcanoes combining field data and numerical simulations, and calculating conditional ash load probability maps for one or few reference volcanic scenarios (e.g. Barberi et al., 1995; Cioni et al., 2003; Macedonio et al., 2008; Costa et al., 2009; Folch and Sulpizio, 2010; Sulpizio et al., 2012). This approach was very useful to support civil protection emergency plans (e.g., Emergency Plan of Vesuvius; Dipartimento di Protezione Civile, 2019) and it is computationally less expensive and more feasible for near-real-time applications (e.g. Selva et al., 2014). However, it had limitations in representing the full volcanic hazard because uncertainty only accounted for wind conditions (e.g. Macedonio et al., 2008, 2016) but not for the full range of eruptive style, magnitude, and frequency. Furthermore, a single eruptive scenario is not appropriate to achieve an unbiased PVHA (e.g. Selva et al., 2010; Sandri et al., 2016). For this purpose, the analysis of the intra-scenario variability is certainly more complete, allowing a reduction of the epistemic uncertainty (e.g. Selva et al., 2014, 2018; Sandri et al., 2016; Titos et al., 2022; Martín Montésinos et al., 2022).

In recent PVHAs at the Neapolitan volcanoes, the importance of quantifying uncertainty has been largely addressed. For instance, Sandri et al. (2016) proposed a stratified sampling procedure to fully explore the **intra-size-class aleatory variability** comparing the results with the classical approach based on reference volcanic scenarios, in the case of proximal/medial areas and large tephra loads from Somma-Vesuvius and Campi Flegrei. Selva et al. (2018) provided unbiased tephra fallout hazard estimations at Campi Flegrei by using ensemble modelling of alternative choices related to the treatment of submarine eruptive vents and tephra total grain-size distributions considering different mass fraction of ash and percentage of ash aggregates. Since high-performance computational resources are more and more available, Martín Montésinos et al. (2022) proposed a new workflow that was applied to Campi Flegrei, aiming at performing robust and unbiased short- and long-term PVHA on a large-scale (thousands km) and high-resolution (about 2 km) domain, to be used by Civil Protection agencies, aviation companies and other stakeholders. However, all these studies provide output PVHA for single volcanoes, and do never merge into a single quantification the contribution of the three active volcanoes in the Neapolitan area: Mt Vesuvius, Campi Flegrei and Ischia.

A breakthrough study in providing the estimation of the present state of the Neapolitan volcanoes has been proposed by Selva et al. (2022) through the development of a simple physics-based statistical model that satisfactorily fits the eruptive history of all the Neapolitan volcanoes, accounting for potential changes in their eruptive regime. The model is compatible with existing data (including isolated events and long repose periods) and accounts for two activity regimes (high-low) able to describe the temporal modulations in eruptive activity. Thus, the model can provide a homogeneous quantification of the probability of eruption which takes into account the state of the volcano and the possible transitions. Such estimations do not account for

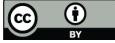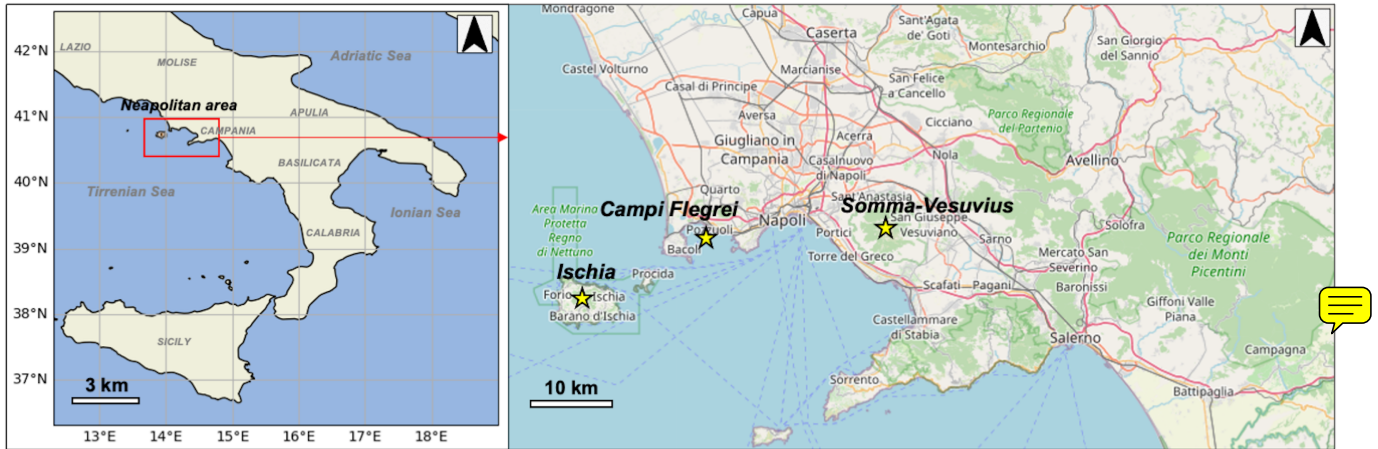

**Figure 1.** Map showing the computational domain (South Italy) used in the numerical simulations with a magnification for the Neapolitan area. Somma-Vesuvius, Campi Flegrei and Ischia volcanoes are indicated as yellow stars. Original map data are available from [www.openstreetmap.org](http://www.openstreetmap.org) ©OpenStreetMap contributors 2022. Distributed under the Open Data Commons Open Database License (ODbL) v1.0.(OpenStreetMap contributors, 2022).

monitoring data or potential state of unrest, as these types of information have been recorded only in the last decades, while they are obviously missing along the rest of the eruptive history, but they provide a homogeneous input for long-term volcanic hazard.

In this work, by merging the model of Selva et al. (2022) into the new PVHA workflow developed by Martínés Montesinos et al. (2022), we provide a prototypical methodology for long-term tephra fallout hazard assessment on a large-scale domain (Southern Italy) at 3 km resolution, combining the impacts of the three active Neapolitan volcanoes. Since the statistical evaluation of the fallout hazard requires to take into account a wide spectrum of different volcanic scenarios, we explored the intrinsic variability of the explosive eruptions performing a large number of numerical simulations of tephra dispersion from each volcano, considering the wind patterns over the last 30 years. All simulations were combined to calculate the Averaged Return Period (ARP) of overcoming different tephra load thresholds within a 50-years exposure time. Then, we applied hazard disaggregation (Bazzurro and Cornell, 1999) to evaluate quantitatively the importance of the different volcanoes and of the different eruptive sizes in the different target area. This technique, which is widely used in seismic and tsunami hazard analyses, in volcanology can provide important clues about many choices made whenever specific eruptive scenarios were chosen, or when high/low priority were given to one or to another volcanic source or size.

In this regard, the outcomes of this study add new insights on the volcanic risk assessment in Southern Italy. In the following, we present the eruptive history of the Neapolitan volcanoes (Section 2), the methodology (Section 3), the discussion of the obtained results (Section 4), followed by the conclusions (Section 5).



## 2 Eruptive history of Neapolitan Volcanoes

### 2.1 Somma-Vesuvius

The Somma-Vesuvius volcanic complex (Fig. 1) consists of an older volcano, Mt. Somma, dissected by a summit caldera, in which the Vesuvius cone grew after the AD 472 eruption (Santacroce et al., 2008). Four Plinian eruptions associated with caldera collapses repeatedly truncated the Somma volcanic edifice, forming the present-day summit caldera (e.g. Cioni et al., 1999; Santacroce et al., 2008). These are the Pomici di Base ( $22.03 \pm 0.18$  cal kyr BP; Santacroce et al., 2008), Mercato ( $8.89 \pm 0.09$  cal kyr BP; Mele et al., 2011), Avellino ( $3.90 \pm 0.04$  cal kyr BP; Sevink et al., 2011), and Pompeii (AD 79; Sigurdsson and Carey, 1985) eruption. Sub-Plinian eruptions occurred at 19.1 cal kyr BP (Greenfish; Cioni et al., 2003), between Avellino and Pompeii eruptions (APS; Andronico and Cioni, 2002), in AD 472 (Sulpizio et al., 2005) and in AD 1631 (Rosi et al., 1993). The most recent cycle of Vesuvius activity between AD 1631 and 1944 was characterized by recurrent summit and lateral lava effusions associated with semi-persistent and mild explosive activities, interrupted by quiescence periods lasting from months to a maximum of seven years (Santacroce, 1987; Cioni et al., 2008). During this period, Vesuvius produced a few violent Strombolian eruptions, such as in AD 1822, AD 1906 and AD 1944 (e.g. Arrighi et al., 2001; Cole and Scarpati, 2010).

### 2.2 Campi Flegrei Caldera

The Campi Flegrei caldera (Fig. 1) results from at least two main nested collapses related to the Campanian Ignimbrite (CI; 40 ka; e.g. Orsi et al., 1996; De Vivo et al., 2001; Giaccio et al., 2017) and Neapolitan Yellow Tuff (NYT; 15 ka; e.g. Deino et al., 2004) eruptions. A magnitude 6.6 eruption (corresponding to a volcanic explosivity index VEI = 6) occurred at about 29 ka (Albert et al., 2019). In the last 15 kyr, volcanism occurred within the NYT caldera in three main epochs of activity (Epoch I, II and III) dated between 15–9.5, 8.6–8.2, and 4.8–3.8 ka, respectively (Orsi et al., 2004). After a long quiescence, the last eruption generated the Monte Nuovo tuff cone in AD 1538 (e.g. Di Vito et al., 1999; Costa et al., 2022). Most of the explosive eruptions were low- or medium- magnitude events with products dispersed over areas ranging from a few to 500 km<sup>2</sup>, while the highest magnitude Plinian events as Pomici Principali (12.4 cal kyr BP; Sulpizio et al., 2010) and Agnano-Monte Spina (AMS, 4.5 cal kyr BP; de Vita et al., 1999; Sulpizio et al., 2010) dispersed their products over areas >1,000 km<sup>2</sup> (Orsi et al., 2009).

### 2.3 Ischia

Ischia is a volcanic island located in the northwestern part of the Gulf of Naples (Fig. 1; Orsi et al., 1996) characterized by alternating effusive and explosive eruptions (e.g. Selva et al., 2019). Volcanism at Ischia dates back to more than 150 ka and continued with centuries to millennia of quiescence, until the most recent eruption occurred in AD 1302 (e.g. Vezzoli and Barberi, 1988; Sbrana and Toccaceli, 2011; Sbrana et al., 2018). A poorly defined period of pyroclastic activity predated large Mt. Epomeo Green Tuff caldera-forming eruption (55 ka Civetta and Gallo, 1991) which was followed by resurgence (Orsi et al., 1991). Volcanism continued up to 33 ka with a series of explosive eruptions of trachytic magmas from the present



south-western and north-western periphery of the island. After 5 ka of quiescence volcanism resumed at about 28 ka with the eruption of trachy-basaltic magma along the south-eastern coast, and then continued sporadically until 18 ka. The most recent period of activity began at about 10 ka but it is mainly concentrated in the past 2.9 kyr, with almost all the vents in the eastern part of the island (Selva et al., 2019). At least 35 effusive and explosive eruptions took place, emplacing lava domes, high-aspect ratio lava flows, tuff cones, tuff rings and variably dispersed fallout and pyroclastic density currents deposits. The most significant recent explosive eruption is the Cretaio eruption that occurred in the 1<sup>st</sup> century AD (Orsi et al., 1996; Selva et al., 2019).

### 3 Methodology

#### 145 3.1 PVHA strategy

Similarly to seismic or tsunami hazard (PSHA or PTHA, respectively), PVHA should, in principle, aggregate the distribution of the different sources, quantifying the exceedance probability or the mean annual frequency of a specific seismic threshold at a specific location in a given exposure time window (e.g. Grezio et al., 2017; Gerstenberger et al., 2020, and references therein). Translated into the volcanic context, we implemented the PVHA related to a set  $S$  of volcanoes by calculating the mean annual frequency with which a certain hazardous phenomenon quantified by the intensity measure  $z$  (tephra load at the ground, in our case) exceeds the threshold  $Z$  at a geographical location  $\mathbf{x}$  during a given exposure time window  $\Delta T$ . Following Martínéz Montesinos et al. (2022) and Selva et al. (2022), we quantify by:

$$\lambda(z > Z; \mathbf{x}, \Delta T) = \sum_{i \in S} \nu_i \sum_{j \in \text{vent}_i} \sum_{k \in \text{size}_i} P(\sigma_{ik} | E_i) P(\gamma_{ij} | E_i) P(z > Z | E_i, \sigma_{ik}, \gamma_{ij}) \quad (1)$$

where

- 155 –  $\nu_i$  represents the annual rate of occurrence of eruptions from the volcano  $i$  for the exposure time  $\Delta T$ . The evaluation of this parameter is discussed in Section 3.3.
- Considering for each volcano a set of possible eruptive size classes,  $P(\sigma_{ik} | E_i)$  represents the probability that, in case of eruption  $E$  from the volcano  $i$ , it will be of size class  $k$  ( $\sigma_{ik}$ ). For Somma-Vesuvius, we considered three eruptive (explosive) size classes proposed by Sandri et al. (2016): Small (in which are included the AD 1906 and AD 1944 eruptions Arrighi et al., 2001; Cole and Scarpati, 2010), Medium (in which are included the AD 472 and AD 1631 eruptions; Sulpizio et al., 2005; Rosi et al., 1993) and Large (in which are included the Pompei and Avellino eruptions; Macedonio et al., 2008; Sulpizio et al., 2010). For Campi Flegrei, again the three explosive eruption size classes adopted in Sandri et al. (2016) and Selva et al. (2018) are considered: Small (e.g. Averno 2; Di Vito et al., 2011), Medium (e.g. Astroni 6; Mele et al., 2020), Large (e.g. Agnano Monte Spina; de Vita et al., 1999). Ischia has one eruption size class defined as Large, representing the Cretaio Tephra (ca. 60 CE; Orsi et al., 1992, 1996) which is the largest explosive eruption



170

that occurred in the last 3 kyr beside other 33 eruptions of lower intensity (de Vita et al., 2010; Selva et al., 2019, 2022; Primerano et al., 2021). The parameters related to all eruption size classes are reported in A1. The probability of the different size classes corresponds to node 5 of the BET model (Marzocchi et al., 2007, 2010), and it is here evaluated jointly to  $\nu_i$ ;

175

– Considering for each volcano a set of possible eruptive vent locations,  $P(\gamma_{ij}|E_i)$  represents the probability of the vent activation  $\gamma_{ij}$ , conditional to the occurrence of the eruption  $E$  from the volcano  $i$ . For Somma-Vesuvius, being a stratovolcano, a single vent location is fixed on the present-day crater since the recurrence of the recent eruptions started from there and the likelihood of different vent positions is an order of magnitude smaller (Sandri et al., 2018). At Ischia, the majority of eruptive vents are preferentially distributed along the NS direction therefore we fixed a single vent corresponding to the source of the Cretaio Tephra (Primerano et al., 2021), assuming that the spatial probability on vent locations would not affect the tephra ground load at distal areas onland in the target domain (Fig. 1). For Campi Flegrei, given the dimensions of the caldera with respect to its proximal locations in the target domain (Fig. 1), tephra dispersion is simulated from an equally-spaced grid of potential vents having a different probability of opening (conditional to the occurrence of an eruption) based on the geological and geomorphological features of the past eruptive vents opened in the last 5000 years (Selva et al., 2012). This probability corresponds to Node 4 in the BET methodology, used for example in Selva et al. (2012) and Martínéz Montesinos et al. (2022);

180

185

–  $P(z > Z|E_i, \sigma_{ik}, \gamma_{ij})$  represents the probability that a tephra load  $z$  exceeds the threshold  $Z$  at the target location  $\mathbf{x}$  due to the eruption  $E$  of size class  $\sigma_{ik}$  from the vent  $\gamma_{ij}$  from the volcano  $i$ , conditional to the occurrence of such an eruption. To calculate this probability, simulations of tephra dispersion and deposition were performed with FALL3D-8.0 (Folch et al., 2020) using as weather conditions those retrieved from the ECMWF ERA5 database (Hersbach et al., 2018) with a spatial resolution of  $0.03^\circ \times 0.03^\circ$  and a temporal resolution of 3 h. These data were randomly sampled considering 50 days per year from 01/01/1991 to 31/12/2020, so that the simulation days are homogeneously distributed within the 30-year timespan. Adopting the approach proposed in Sandri et al., each simulation represents a volcanic scenario characterized by a set of eruptive source parameters that are randomly sampled from their probability density functions (Tables A1, A2, A3). For each volcano, 1500 volcanic scenarios were assigned to each eruption size class. In this way, the total number of simulations is 10500 simulations (4500, Somma-Vesuvius; 4500, Campi Flegrei; 1500 Ischia). This probability corresponds to Nodes 7&8 in the BET methodology used, for example, in Selva et al. (2012), Tonini et al. (2015) and in Martínéz Montesinos et al. (2022).

190

195

In this way, the mean annual frequency  $\lambda(z; \mathbf{x}, \Delta T)$  to have a tephra load  $z$  overcoming a threshold  $Z$  at location  $\mathbf{x}$  during the 50-years exposure time  $\Delta T$  from the Neapolitan volcanoes is computed. The curve  $\lambda(z > Z; \mathbf{x}, \Delta T)$  as a function of the threshold  $Z$  represents the final result of PVHA in each target point  $\mathbf{x}$ , and it is usually referred to as the hazard curve. This is replicated all over the computational domain, which here covers Southern Italy. Whenever alternative quantifications of one

200

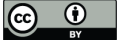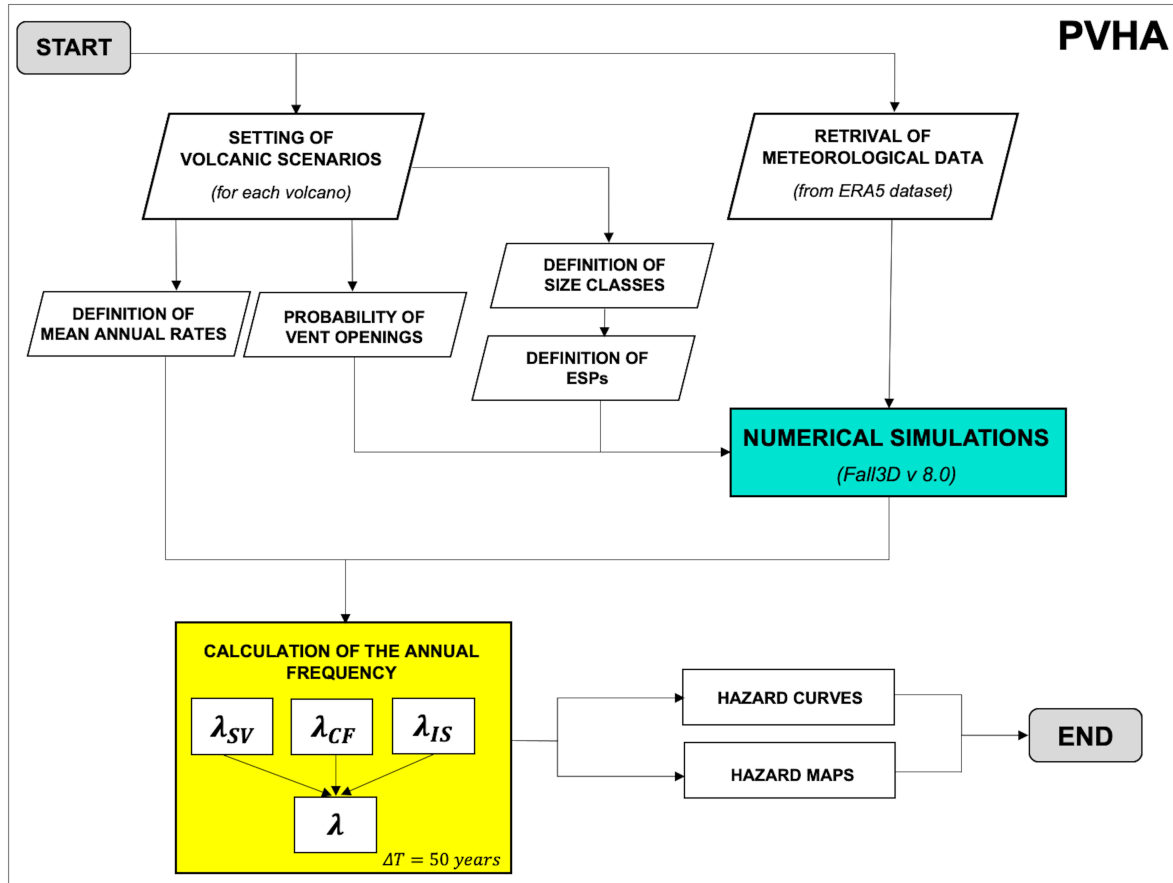

**Figure 2.** Workflow of the PVHA strategy used to provide the calculation of the annual frequency of exceeding a specific intensity threshold value at the target site in 50 years associated with tephra fallout from the Neapolitan volcanoes, and the relative hazard curves and maps.

or more of the parameters in (1) exist, they jointly represent an estimation of the epistemic uncertainty (see Marzocchi et al., 2021, and references therein).

The specific contribution of each volcano, each eruptive size at one volcano, or whatever other definition of a group of potential eruptions, may be quantitatively evaluated using the hazard disaggregation strategy discussed in Bazzurro and Cornell (1999). This method consists of evaluating the probability that the occurrence of a given exceedance ( $z > Z$ ) is caused by a given group of sources ( $G$ ),  $P(G|z > Z)$ , based on the Bayes rule. Since this evaluation reduces to the quantification of specific ratios of the addends of (1), it can always be quantified, and thus it represents nowadays a standard post-processing tool for probabilistic hazard, especially seismic hazard.





### 3.2 Tephra dispersion modeling

210 In this study, we used FALL3D-8.0 (Folch et al., 2020), the Eulerian tephra dispersion model based on the so-called ad-  
vection–diffusion–sedimentation (ADS) equations for simulating dispersion of volcanic tephra, gas, and radionuclides, with  
a wide range of possible model parameterization options (e.g., eruptive parameters, source model, ash aggregation, domain  
discretization), including the possibility to describe the gravitational spreading of the umbrella region (Costa et al., 2013). In  
the used version (v8.0) the parallelisation strategy, input/output (I/O), model pre-process workflows and memory management  
215 have been improved, leading to a better code scalability, efficiency and an overall capability to handle much larger problems.  
The outputs are time-dependent load at the ground and atmospheric ash concentration.

In this work, simulations were performed on the HPC cluster ADA of the Istituto Nazionale di Geofisica e Vulcanologia,  
Bologna (Italy). We run one simulation per sampled day in order to cover all possible daily and seasonal meteorological  
conditions over the last 30 years.

220 The eruptive source parameters represent the main volcanological inputs in the model, which are described in detail in tables  
A1, A2, A3. In table A4 we report the summary of the key model parameters which are not dependent on the eruption size  
class (appendix A).

The total time spent for each simulation varies according to the duration of the eruption which depends on the eruption  
size class, although the model runs for 24 h additional hours after the source term is switched off given the large size of the  
225 target domain: this is necessary in order to ensure that most of the remaining airborne material has sufficient time to settle or  
to leave the computational domain through the lateral boundaries. We considered a spherical projection computational domain  
from 36.31° N to 42.61° N in latitude and from 12.31° W to 19° E in longitude, with a 0.03°-resolution gridded domain and a  
vertical  $\sigma$  coordinate system with a linear decay (Fig. 1).

### 3.3 Construction of hazard curves and maps

230 In this study, hazard intensity represents tephra accumulated on the ground per unit area, typically expressed in  $\text{kg m}^{-2}$  (e.g.  
Sandri et al., 2016). As discussed in Section 3.1, we quantify the hazard as the mean annual frequency of exceeding a specific  
intensity threshold value at the target site  $\mathbf{x}$  in 50 years, due to the activity of the three Neapolitan volcanoes. As discussed  
in Selva et al. (2022), the probability the different sizes at each volcano  $P(\sigma_{ik}|E_i)$  may significantly vary through time, as  
the regime of the volcanoes changes. For example, at Somma-Vesuvius during open-conduit periods small sizes are favored,  
235 while large explosive eruptions are mainly expected during close-conduit periods. On the contrary, it is possible to quantify the  
average annual eruption rate of the eruption size class  $k$  of the volcano  $i$  as:

$$\nu_{ik} = \nu_i P(\sigma_{ik}|E_i) \quad (2)$$

considering the potential switch between regimes and the different size distributions in each region (Selva et al., 2022). To  
account for this, the contribution of volcano  $i$  in (1) can be easily rewritten as:

$$240 \lambda_i(Z; \mathbf{x}) = \sum_{j \in \text{vent}} \sum_{k \in \text{size}} \nu_{ik} P(\gamma_{ij}|E_i) P(Z > z|E_i, \sigma_{ik}, \gamma_{ij}) \quad (3)$$



The quantification of  $\nu_{ik}$  was based on the recorded activities of the Neapolitan volcanoes in the last 2 kyr for Somma-Vesuvius, 15 kyr for Campi Flegrei and 3 kyr for Ischia, assuming a non-homogeneous Poisson model because volcanoes randomly oscillate through time between two discrete regimes with different size distributions (Selva et al., 2022). For short  $\Delta T$  (e.g. shorter than 100 years),  $\nu_{ik}$  varies depending on the initial state of the volcano and the length of  $\Delta T$ , due to the persistence of the volcano in its initial state. Indeed, during short  $\Delta T$  the state of the volcanic activity is not likely to change; on the contrary, the longer  $\Delta T$ , the larger the probability to change the regime. In Tables A2, A3 we report the values of  $\nu_{ik}$  for Somma-Vesuvius, Campi Flegrei and Ischia in 50 years. The rates  $\nu_{ik}$  intrinsically account for the aleatory uncertainty on eruption occurrence, changes in the regime, and consequent eruption size distribution (Selva et al., 2022). Alternative models do not exist, so the epistemic uncertainty on these values is not quantified here.

The probabilities  $P(\gamma_{ij}|E_i)$  and  $P(z > Z|E_i, \sigma_{ik}, \gamma_{ij})$  were calculated using the BET workflow at Node 4 (vent opening) and Nodes 7&8 (tephra reaching point  $z$  - tephra load overcoming threshold  $Z$ ), respectively. The BET model formally accounts for potential epistemic uncertainty on the probability at each node. However, this may be severely underestimated, whenever alternative approaches do produce significantly different results (Marzocchi et al., 2021). For this reason, the epistemic uncertainty is neglected and only the average probabilities are evaluated.

Simulations were post-processed for each eruption size class in order to quantify the mean annual frequencies of exceeding a given accumulation of tephra on the computational domain (see Fig. 1) in 50 years. The relative hazard maps were built by assessing a mean hazard curve in each point, considering 16 intensity thresholds from 1 to  $\sim 1600 \text{ kg m}^{-2}$ , that roughly correspond to thicknesses from 1 mm to 1.6 m (considering a typical deposit density of  $1000 \text{ kg m}^{-3}$ ).

Generally, values of  $\sim 1$  and  $\sim 10 \text{ kg m}^{-2}$  are referred to non-conservative and conservative bounds for airport disruption (e.g. Folch and Sulpizio, 2010; Sulpizio et al., 2012). In the Neapolitan area, the typical thresholds of 200, 300 and  $400 \text{ kg m}^{-2}$  are used for roof collapses (e.g. Pareschi et al., 2000; Orsi et al., 2004; Spence et al., 2005). According to these references, here we considered two tephra load thresholds:  $10 \text{ kg m}^{-2}$  ( $\sim 1 \text{ cm}$ ) and  $300 \text{ kg m}^{-2}$  ( $\sim 30 \text{ cm}$ ). In Figure 2 we summarize the workflow of the PVHA strategy used in this study.

### 3.4 Hazard disaggregation

In a multi-volcano hazard assessment perspective, establishing which volcano contributes the most to the hazard at a given location, assuming that a threshold is overcome, is crucial. As much as relevant is assessing which eruption size class provides the largest contribution exceeding a given threshold. These issues can be addressed throughout hazard disaggregation analysis as detailed in the following.

#### 3.4.1 Hazard disaggregation by volcanic source

The hazard disaggregation was originally developed to analyze the importance of the different seismic source regions on the seismic probabilistic hazard assessment (SPHA). In this study, it is used to calculate the contribution to the total hazard in each target point of each volcanic source. This intrinsically accounts for both the probability of eruption and the probability that each specific eruption propagates from the source to the target point.



At first, the disaggregation is evaluated for individual volcanoes. In this case, we evaluate  $P(E_i|z > Z)$  which is the probability that, given the observation of the exceedance of a given threshold  $Z$ , this has been caused by an eruption  $E$  from the volcano  $i$ . To simplify its interpretation, we name this probability dominance  $D_i$  in a given spatial point  $\mathbf{x}$ .

Following Bazzurro and Cornell (1999), this probability can be calculated simply evaluating the ratio of the mean annual frequency of overcoming a given threshold  $Z$  in  $\mathbf{x}$  from that volcano ( $\lambda_i$ , see eq. 3), to the mean annual frequency obtained by the sum of the impacts of the three volcanoes in 50 years, that is:

$$D_i = P(E_i|z > Z) = \frac{\lambda_i(z > Z, \mathbf{x})}{\sum_i \lambda_i(z > Z, \mathbf{x})} \quad (4)$$

To be meaningful, this calculation must be carried out upon a statistically significant number of simulations overcoming such a tephra load threshold, therefore we focus the attention only on a sub-domain, neglecting the distal areas that are reached by a number of simulations less than  $10^{1.5}$  (ca. 30 simulations).

### 3.4.2 Hazard disaggregation by eruption size class

This kind of disaggregation is performed by calculating, for Somma-Vesuvius and Campi Flegrei only (since Ischia has only one explosive size), the hazard contribution of the different eruption size classes considered. In this case, we first quantify the probability  $P(\sigma_{ik}|z > Z; E_i)$  of overcoming the tephra threshold  $Z$  due to the occurrence of an eruption  $E$  from the volcano  $i$  having the eruption size class  $\sigma_{ik}$ . As in equation (4), we express this disaggregation in terms of relative dominance of eruption size class  $D_{ik}$ , evaluated as:

$$D_{ik} = P(\sigma_{ik}|z > Z; E_i) = \frac{\lambda_{ik}(z > Z; \mathbf{x})}{\sum_k \lambda_{ik}(z > Z, \mathbf{x})} \quad (5)$$

Notably, the summation in the dividend is not extended to  $i$ , meaning that each volcano is treated separately.

## 4 Results and discussion

### 4.1 Long-term hazard maps

In this section, we report the results of the PVHA and of different levels of disaggregation, from the total hazard assessment of the volcanic sources to the evaluation of the impact due to each volcano obtained by aggregating their eruption size classes.

Generally, hazard curves may be expressed in terms of ARP which is the inverse of the mean annual frequency. For sake of simplicity: the most likely values of the ground tephra load occur frequently, and may be associated to relatively short ARPs (e.g. 100 years), while larger  $Z$  are exceeded more rarely, corresponding to longer ARPs.

In Figure 3 the long-term mean hazard maps considering each volcano individually (Figs. 3a-c) and the total mean hazard maps obtained by aggregating the effect of each volcano (Fig. 3d) (see eqn.4) are shown. Maps are obtained cutting hazard curves at three different ARPs of 100, 500 and 1000 years, respectively, and reporting in each point of the domain the corresponding tephra load.



At Somma-Vesuvius (Fig. 3a) we show that, for an ARP of 100 years, tephra loads range from  $\sim 100$  to  $300 \text{ kg m}^{-2}$  in proximity to the volcano, decreasing to  $\sim 1 - 10 \text{ kg m}^{-2}$  within  $\sim 250 \text{ km}$ . At an ARP of 500 years, higher loads are obviously expected ( $\sim 300 - 1000 \text{ kg m}^{-2}$  within  $\sim 100 \text{ km}$ ); at larger distances ( $\sim 200 \text{ km}$ ) the maximum tephra load expected with ARP = 500y is  $100 \text{ kg m}^{-2}$ . For the remaining part of the domain, the expected tephra load with this ARP is  $\sim 1 - 10 \text{ kg m}^{-2}$ . For an ARP of 1000 years, the boundaries of tephra load isolines are larger than the previous one, as expected, covering almost the entire computation domain.

At Campi Flegrei (Fig. 3b), the expected tephra load with ARP of 100 years ranges from 1 to  $100 \text{ kg m}^{-2}$  only in the proximity of the caldera. This is partly due to the uncertainty on the vent position that “blurs” the resulting hazard maps, although offering a more realistic degree of knowledge on future eruptions (Sandri et al., 2016; Massaro et al., 2022). Higher values of tephra loads (from 1 to  $500 \text{ kg m}^{-2}$ ) are expected when ARP is 500 years, decreasing with distances larger than  $\sim 80 \text{ km}$ . For an ARP of 1000 years, the expected tephra load is higher in the proximity of Campi Flegrei, reaching  $\sim 1 - 10 \text{ kg m}^{-2}$  within  $\sim 50 \text{ km}$ .

For Ischia, Figure 3c shows that non-negligible tephra load (between 10 and  $300 \text{ kg m}^{-2}$ ) is expected only on the island when ARP is 100 years; for ARP of 500 and 1000 years, the highest tephra loads on Italy mainland are expected around Ischia and the Campi Flegrei area, decreasing up to a range of  $1 - 10 \text{ kg m}^{-2}$  for distances between  $\sim 100 - 170 \text{ km}$ .

The total long-term mean hazard maps (Fig. 3d) is obtained by summing the three individual hazard curves (eq. 1) and cutting the resulting total hazard curve. This corresponds to assuming the independence between different volcanoes. For an ARP of 100 years, areas surrounding the volcanic sources are exposed to tephra loads from 300 to  $1000 \text{ kg m}^{-2}$ ; loads of  $\sim 200 - 100 \text{ kg m}^{-2}$  are expected within  $\sim 150 \text{ km}$  decreasing up to  $1 - 10 \text{ kg m}^{-2}$  at  $\sim 250 \text{ km}$ . For ARPs of 500 and 1000 years, the boundaries of the tephra load isolines become larger with respect to the previous one, as expected.

We stress that the fringed edges of the distal tephra load are due to a numerical artifact depending on the low number of simulations reaching the targets on the computational domain (Fig. 3).

Somma-Vesuvius shows the largest expected tephra load for all ARPs because its mean annual rate of eruptions is higher by one order of magnitude than those of Campi Flegrei and Ischia (Selva et al., 2022, Tab. C1). Indeed, Campi Flegrei and Ischia are responsible for an expected tephra load  $Z = 10 \text{ kg m}^{-2}$  only in proximity of their vents for longer ARPs (500-1000 years). We also remark that the long-term hazard maps show the aleatory uncertainty since, for each volcano, we used the mean annual rate  $\nu_{ik}$  corresponding to each eruption size class for a time exposure of 50 years (Tab. C1).

## 4.2 Hazard disaggregation analysis

### 4.2.1 Volcanic source disaggregation

The disaggregated contribution of each volcaninc source in overcoming the threshold of  $300 \text{ kg m}^{-2}$  in 50 years is shown in Figure 4a. Somma-Vesuvius (green area) dominates the largest part of the sub-domain considered, up to distances of  $\sim 90 \text{ km}$  (green area; Fig. 4a), while Campi Flegrei and Ischia show their dominance within a radius of a few km from their respective vents (red and blue areas; Fig. 4a). It is worth noting that this considers both the different probability of eruptions and the

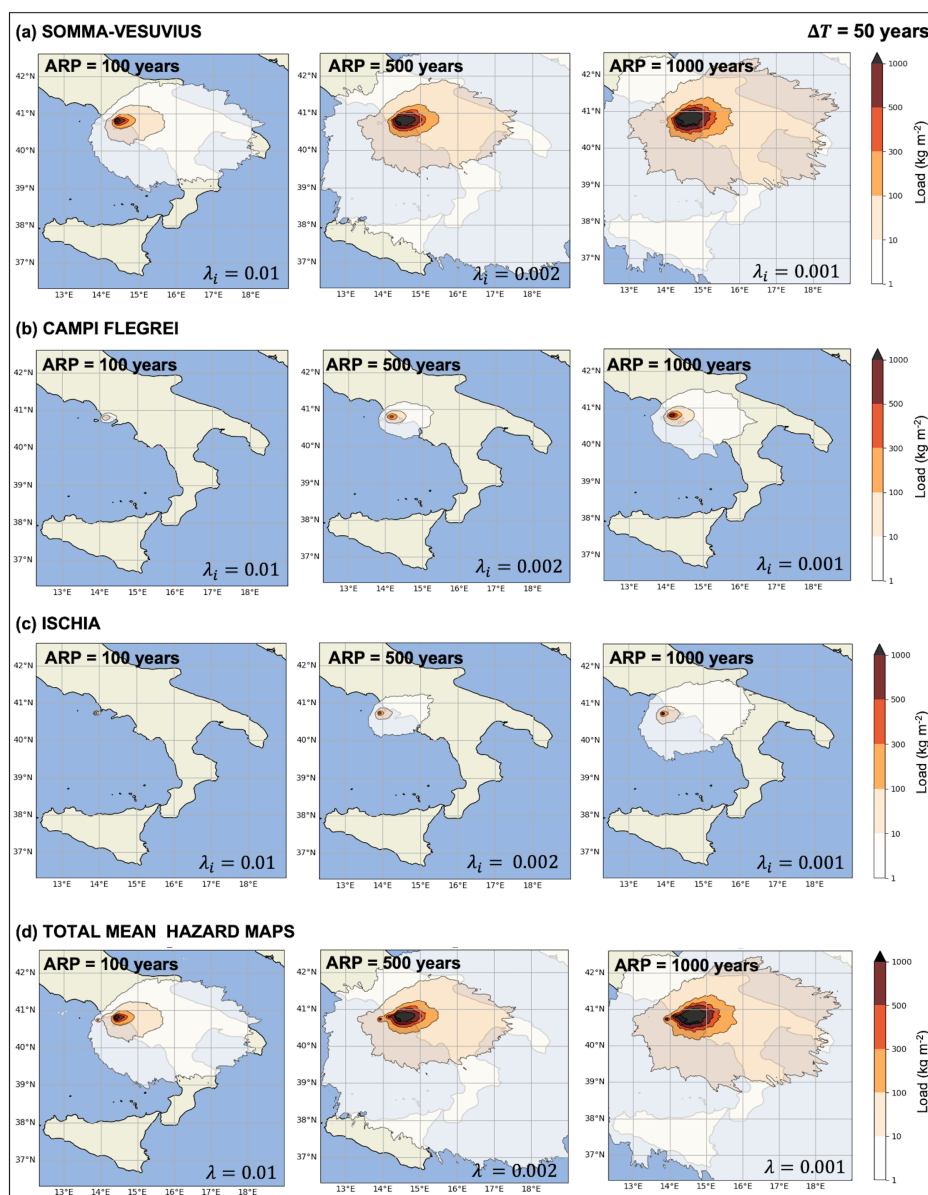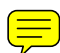

**Figure 3.** Long-term hazard maps reporting the mean hazard intensity (tephra load,  $\text{kg m}^{-2}$ ) in 50 years as a function of the ARP (100, 500 and 1000 years) due to the impact of: a) Somma-Vesuvius (aggregated eruption sizes: Small, Medium, Large); b) Campi Flegrei (aggregated eruption sizes: Small, Medium, Large); c) Ischia (single eruption size: Large); d) Long-term hazard maps in which the combined impact of the three volcanic sources is taken into account. For each intensity threshold (colorbar label), the maps show the areas where that value is expected to be exceeded after 24 hours from eruption onset with that ARP.

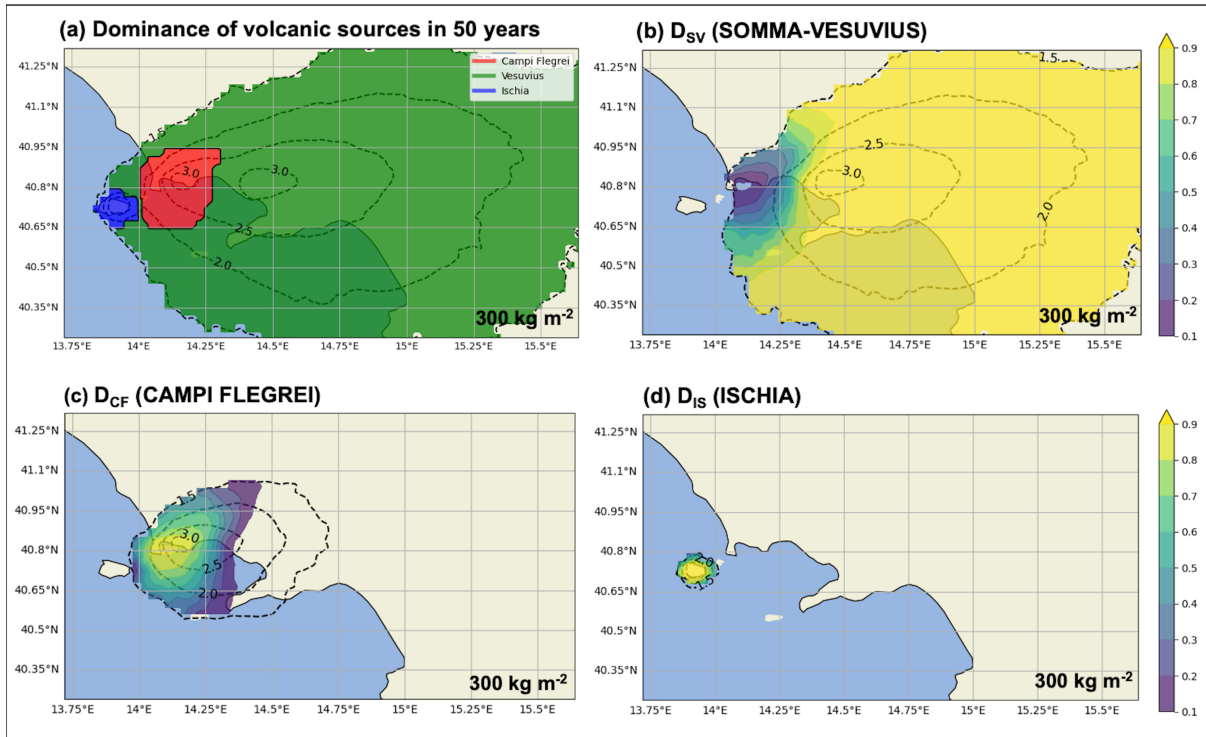

**Figure 4.** Disaggregation per “volcanic source”. a) Map showing, in each point, which volcano contributes the most to the hazard of overcoming  $300 \text{ kg m}^{-2}$  due to the occurrence of eruption in 50 years. In panels b), c) and d), the relative dominance of overcoming the threshold due to the occurrence of eruption from Somma-Vesuvius, Campi Flegrei and Ischia respectively is shown. The black dotted isolines encompass the areas where the labeled number of simulations (in  $\log_{10}$  scale) producing a tephra load greater than  $300 \text{ kg m}^{-2}$  is exceeded.

different probability of dispersions for the various eruptive sizes. Therefore, these results show the much higher probability of eruption at Mt. Vesuvius led to a general dominance of this volcano, which is overcome by the other volcanoes only upwind (prevalent winds here flow toward south-east), where dispersion from Mt. Vesuvius is less likely. This tendency is also highlighted by mapping, for each volcano separately, the actual value of  $D_i$  for overcoming the threshold of  $300 \text{ kg m}^{-2}$  (Fig. 4, panels b-c-d). We also remark that the black dotted isolines represented in this and following figures encompass the areas in which different numbers of simulations (in  $\log_{10}$  scale) produce a tephra load greater than  $300 \text{ kg m}^{-2}$ : the larger this number, the more constrained is this probability since evaluated on a larger number of simulations.

#### 4.2.2 Size class disaggregation considering the tephra thresholds of 300 and $10 \text{ kg m}^{-2}$

Figure 5a shows the largest relative dominance among the three eruption size classes considered for Somma-Vesuvius and their contributions separately, while 5b-d show, respectively, the dominance in overcoming the tephra threshold of  $300 \text{ kg m}^{-2}$  in each target point of the domain, in 50 years. As for the previous analysis, for such a threshold, the significant number of

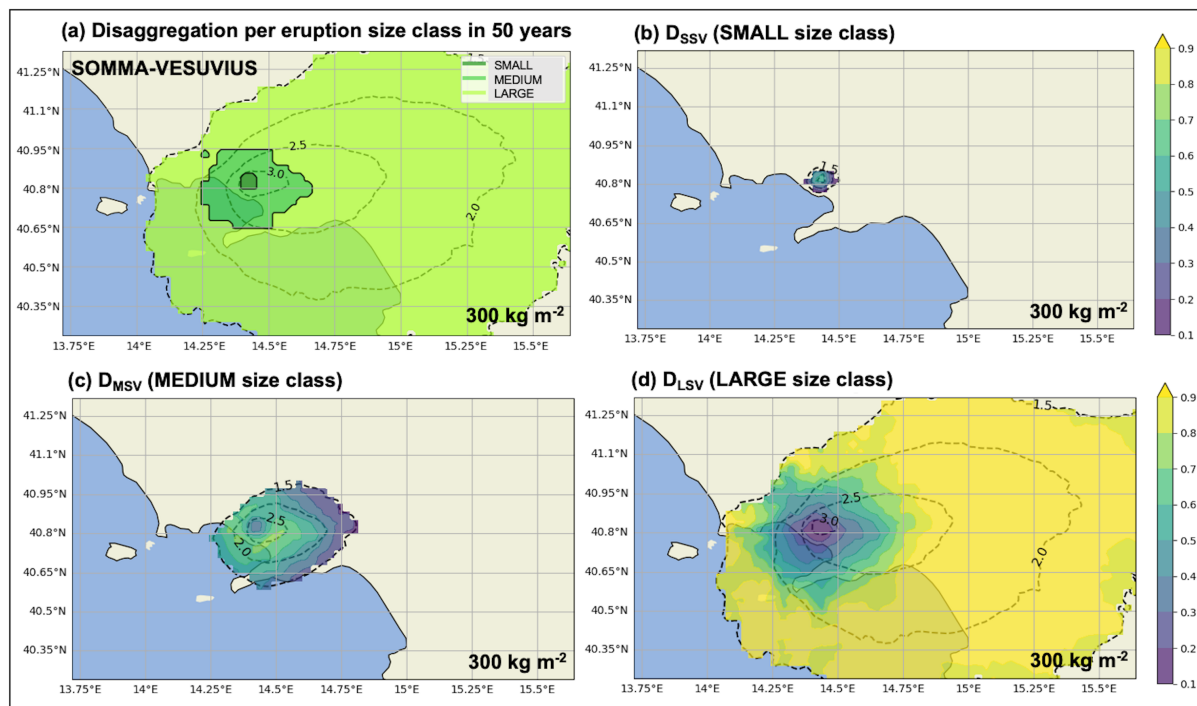

**Figure 5.** Disaggregation per “eruption size class”. a) Map showing, in each point, what eruption size class of Somma-Vesuvius contributes the most to the hazard of overcoming  $300 \text{ kg m}^{-2}$  due to the occurrence of eruption in 50 years. The relative dominance of overcoming the threshold is accounted for b) Small, c) Medium and d) Large size class. Black dashed contours represent the isolines of  $\log_{10}$  number of simulations that produce a tephra ground load exceeding  $300 \text{ kg m}^{-2}$ .

simulations is restricted to distances up to  $\sim 100 \text{ km}$  from the volcanic sources. We note the Small size class is dominant in the proximity of the vent, while the Medium dominates the adjacent area up to distances of  $\sim 20 \text{ km}$ . Distal areas are dominated by the Large size class up to distances of  $\sim 100 \text{ km}$  (Fig. 5a). In Figure 6 we show the same information for Campi Flegrei.

350 The Large size class homogeneously dominates up to distances of  $\sim 100 \text{ km}$  (Fig. 6a). We note that the relative dominance  $D_{i1}$  of the Small class is not visible because ubiquitously lower than 0.1 (Fig. 6b). Although the Medium class provides a contribution from 10 to 40% in exceeding the selected threshold of  $300 \text{ kg m}^{-2}$  in the proximity of the caldera (Fig. 6c), this is nowhere higher than that shown by the Large class ( $> 50\%$ ; Fig. 6d). It is important to stress that a variability on the results of this disaggregation is expected if different thresholds are selected. In this regard, in Figure 6 we report an example of hazard

355 disaggregation per eruption size class for Campi Flegrei in 50 years, considering a tephra threshold of  $10 \text{ kg m}^{-2}$ . In this case, results show that the caldera is dominated by the Small and Medium classes (up to distances of  $\sim 50 \text{ km}$ ) while the Large class covers nearly completely the rest of the southeastern domain reaching distances of  $\sim 250 \text{ km}$ .

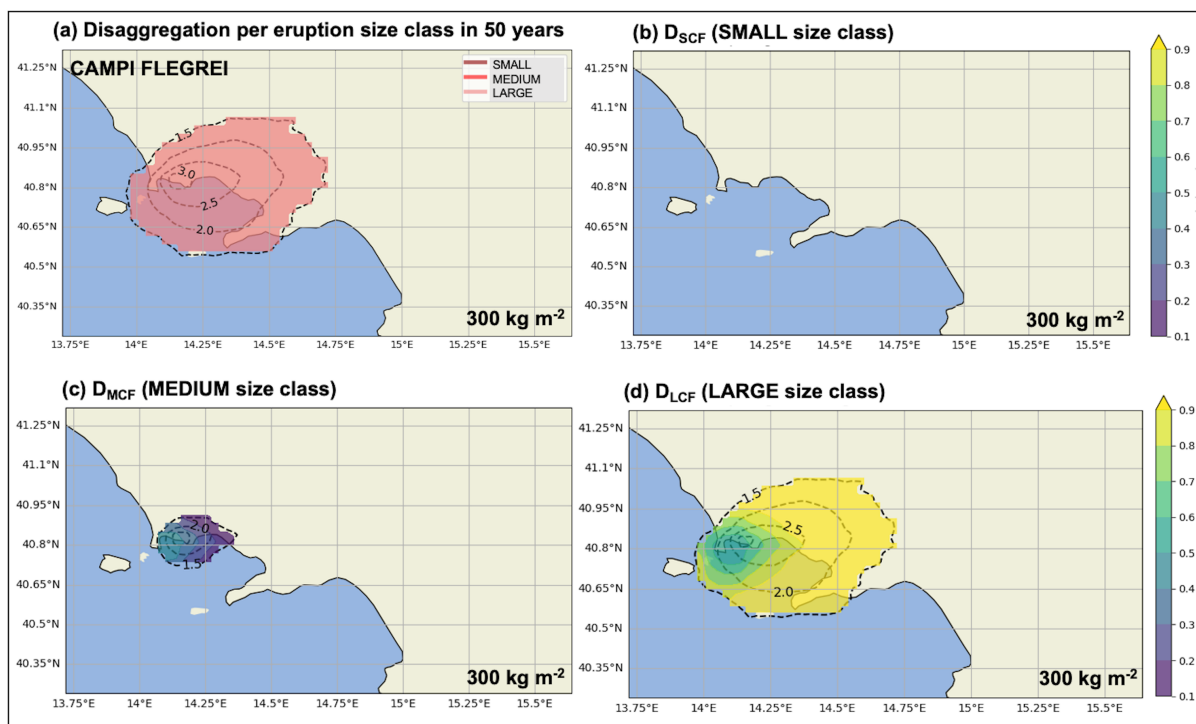

**Figure 6.** Disaggregation per “eruption size class”. a) Map showing, in each point, which eruption size class of Campi Flegrei contributes the most to the hazard of overcoming  $300 \text{ kg m}^{-2}$  due to the occurrence of eruption in 50 years. The relative dominance of overcoming the threshold is accounted for b) Small, c) Medium and d) Large size class. Black dashed contours represent the isolines of  $\log_{10}$  number of simulations that produce a tephra ground load exceeding  $300 \text{ kg m}^{-2}$ .

### 4.2.3 Visualization of the overall disaggregation

In order to have an overall picture of hazard disaggregation, in Figure 7 we show the results of the relative dominance per volcanic source and eruption size class for the threshold of  $300 \text{ kg m}^{-2}$ . As already observed in Figure 5a, the eruptive size classes of Somma-Vesuvius (green shaded colors) dominate in the largest part of the domain, from the Small to the Large class at increasing distances from the vent. Notably, the dark red area corresponding to the Large class of Campi Flegrei covers the whole caldera up to distances  $\sim 30 \text{ km}$ , as indicated in Figure 6a. Interestingly, this area almost coincides with the Yellow Zone for tephra fallout hazard taken as reference by the Italian National Department of Civil Protection ([www.protezionecivile.gov.it](http://www.protezionecivile.gov.it)), which is defined as the area having a probability larger than 5% to overcome  $300 \text{ kg m}^{-2}$  conditional to the occurrence of an eruption of medium size onland (Dipartimento di Protezione Civile, 2019). Therefore, our results confirm that Campi Flegrei mainly dominates in this area, even if that choice was not based on a quantitative evaluation of the dominance. In this area more than 800 thousand inhabitants live, located in Naples and in the surrounding municipalities. Intuitively, Ischia island is dominated by the Ischian events. This occurs up to distances  $\sim 10 \text{ km}$  from the selected vent, and shows that only in this area



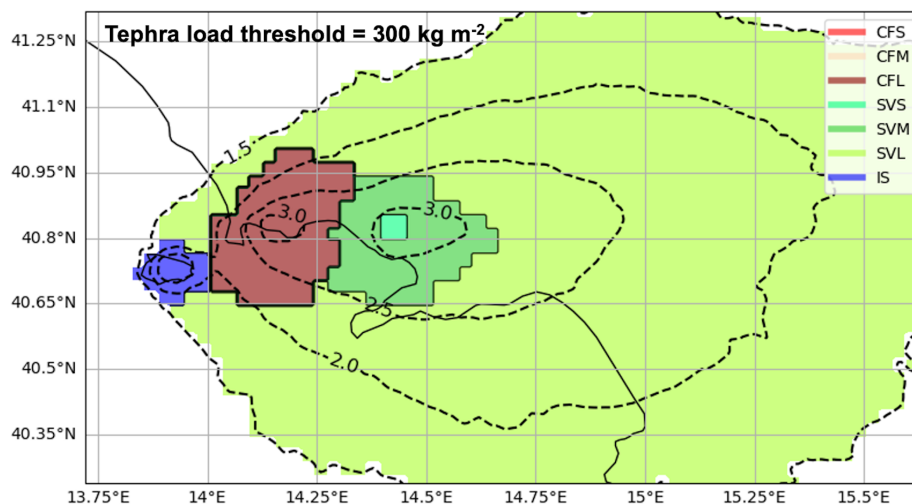

**Figure 7.** Disaggregation per “volcanic source” and “eruption size class”. Map showing, in each point, which eruption size class of Somma-Vesuvius, Campi Flegrei and Ischia contributes the most to the hazard of overcoming  $300 \text{ kg m}^{-2}$  due to the occurrence of eruption in 50 years. Black dashed contours represent the isolines of  $\log_{10}$  number of simulations that produce a tephra ground load exceeding  $300 \text{ kg m}^{-2}$ .

370 it prevails the fact that Ischia is upwinds to the other volcanoes to the fact that Ischian eruptions produce significantly smaller eruptions. The results drastically change when varying the tephra load thresholds. In Figure 8 we show the disaggregation by volcanic source and eruptive size class corresponding to the tephra threshold of  $10 \text{ kg m}^{-2}$ . Here, the entire computational domain is reached by a significant number of simulations with the exception of the northwestern sector and a large part of Sicily. At this load threshold, Somma-Vesuvius provides the largest dominance (green shaded colors) having the Small and Medium classes able to dominate up to distances of  $\sim 50 \text{ km}$  from the vent and the Large class over  $\sim 50 \text{ km}$  along the preferential towards East wind direction. This result is expected for Somma-Vesuvius, which shows the highest mean annual rates in 50 years (Tab. C1). On the contrary, Campi Flegrei shows a reduced-area largest dominance because the mean annual frequency to overcome the  $10 \text{ kg m}^{-2}$  threshold due to an eruption of the Large size class (dark red area) is less than that shown by the Medium and Large size classes of Somma-Vesuvius. Ischia, modeled with a single eruption size class, dominates only locally.

375

380 In Figure 9 we show the relative dominance  $D_{ik}$  of each eruption size class of Somma-Vesuvius in overcoming the tephra threshold of  $10 \text{ kg m}^{-2}$  in 50 years, noting that the Small class contributes to this hazard intensity only within distances of a  $\sim 60 \text{ km}$  from the vent, with a relative dominance of  $\sim 60\%$  only in the proximal areas (Fig. 9a), while the Medium class contributes within distances of  $\sim 100 \text{ km}$  (including the Gulf of Naples, the northern part of the Peninsula Sorrentina and Ischia; Fig. 9b). At further distances we observe the Large class with radial lobes of relative dominance, likely due to the

385 randomness of the sampling of wind conditions (Fig. 9c). In Figure 6b-c-d, we report the same type of results in overcoming the threshold of  $300 \text{ kg m}^{-2}$  for Campi Flegrei.

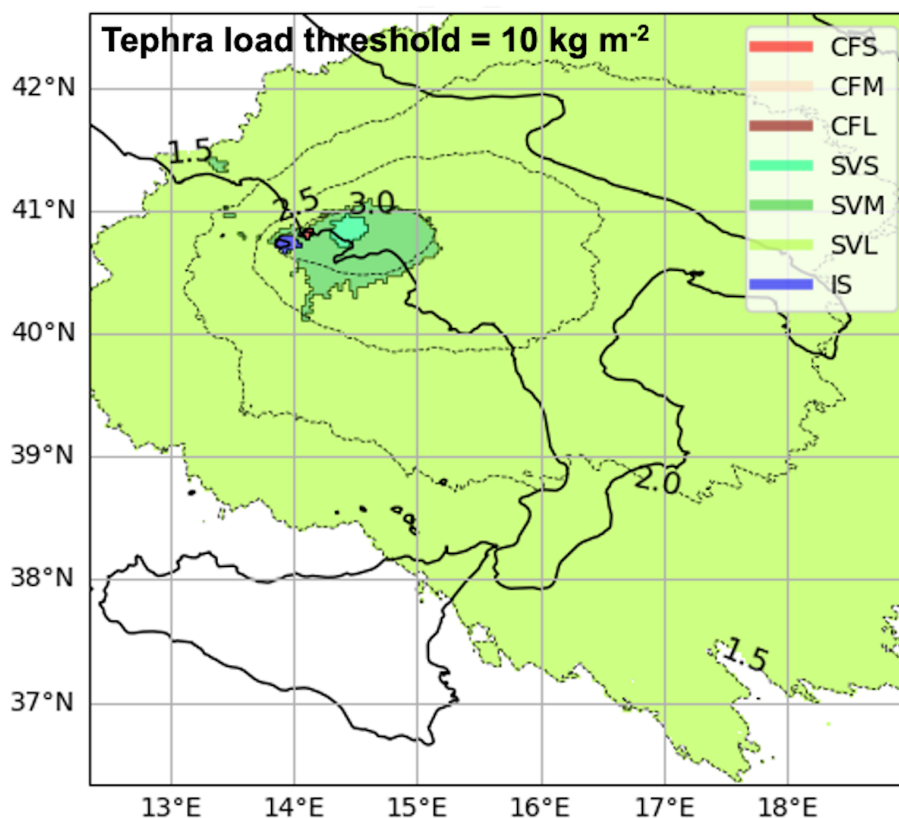

**Figure 8.** Disaggregation per “volcanic source” and “eruption size class”. Map showing, in each point, which eruption size class of Somma-Vesuvius and Campi Flegrei contributes the most to the hazard of overcoming  $10 \text{ kg m}^{-2}$  due to the occurrence of eruption in 50 years. Black dashed contours represent the isolines of  $\log_{10}$  number of simulations that produce a tephra ground load exceeding the threshold of  $10 \text{ kg m}^{-2}$ .

### 4.3 Implications for the PVHA in Neapolitan urban area and for multi-hazard evaluation

The proposed PVHA is firstly presented as a combination of the relative contributions of each volcano in terms of mean annual frequency  $\lambda$  of exceeding different tephra load thresholds at a specific location, considering a reference exposure time  
390 of 50 years. Then, disaggregation analyses show which volcano, and further which eruption size class, impacts the most on hazard, i.e., has a largest probability of causing the exceedance of tephra load thresholds of 10 and  $300 \text{ kg m}^{-2}$ . Even if the disaggregation results are relative to the selected tephra load threshold, this result is general and it is valid for all thresholds. The complete information for all thresholds is reported only in the entire hazard curves. In Figure 10 we provide the hazard  
395 curves showing the mean annual frequency of exceeding the tephra load thresholds for three sites along the dominant wind direction: Pozzuoli, Naples and Torre del Greco. As expected, within the Campi Flegrei caldera (e.g., in Pozzuoli, Fig. 10a) the major hazard is due to Campi Flegrei volcano for all thresholds, also considering that Pozzuoli is located upwind with respect

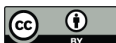

to Somma-Vesuvius. The center of the city of Naples represents a transition case: the hazard curves seem to be overlapped up to tephra loads of  $\sim 10 - 20 \text{ kg m}^{-2}$ , but for higher thresholds (from  $\sim 20$  to  $1000 \text{ kg m}^{-2}$ ) Campi Flegrei shows a higher hazard curve (Fig. 10b). This is in accordance with Selva et al. (2012) indicating that hazard exposure of Naples due to Campi Flegrei caldera, even in quiet periods, is higher than for Somma-Vesuvius, given that expected eruption size classes are comparable (Marzocchi et al., 2004; Orsi et al., 2009) and the city center is closer to the eruptive vents of Campi Flegrei, and more directly downwind (e.g. Selva et al., 2010). Beyond the  $1000 \text{ kg m}^{-2}$  threshold, the inversion occurs (Somma-Vesuvius dominates) but this trend is not reliable. In the case of Torre del Greco, the highest hazard curve is due to Somma-Vesuvius for all the thresholds (Fig. 10c), being located downwind. The results shown in Figures 4-8 are due to the superimposition of two effects: the prevalent wind direction and probability of eruption. The probability of eruption is much higher at Somma-Vesuvius than at the other volcanoes ( $\sim 34\%$  in 50 years vs  $\sim 3\%$  and  $\sim 12\%$  in 50 years, respectively; Selva et al. (2022)). Wind directions statistically prevail towards East in the Neapolitan area (e.g. Macedonio et al., 2016) with moderate seasonal variations (e.g. Costa et al., 2009): this aspect affects the model results making tephra load dispersion oriented (e.g., Figs. 3- 8). This means, for example, that the western side of the domain has lower probability to be reached by a tephra fallout due to Somma-Vesuvius. It is worth noting that some modeling limitations need to be taken into account since they significantly affect the model results, especially at greater distances from the volcanic sources. Although the number of the simulated volcanic scenarios per eruption size class (1500) represents a good compromise between the quality of results and computational costs, it restricts the area of reliable results in terms of number of simulations exceeding the tephra load thresholds at increasing distance from the vents. However, this equally affects all three volcanoes, even if this effect is more evident for Somma-Vesuvius, which has the highest annual rates. It is also worth noting that the model neglects the epistemic uncertainty that, in the future, could be treated by substituting single estimates with ensembles of alternative estimates (Marzocchi et al., 2021; Selva et al., 2022). Considering this as an intrinsic limitation of the methodology, along with the incomplete geological records, this work provides a prototypal methodology for long-term multi-volcano hazard assessment focused on the full quantification of the natural variability of the modeled phenomena, the aleatory uncertainty. The results obtained in this study produce, for the very first time, a complete PVHA, considering all the volcanoes in order to produce the total unconditional hazard. In this sense, our results significantly improve those from the previous PVHA for tephra fallout conditional to the occurrence of specific representative eruptive scenarios from Neapolitan volcanoes (i.e. Macedonio et al., 2008; Costa et al., 2009), conditional to the occurrence of eruptions at one volcano (e.g. Orsi et al., 2009; Selva et al., 2010; Sandri et al., 2016; Selva et al., 2018). In this sense, our PVHA is, for the first time, fully compatible with other hazards studies like the ones for seismic events (Gerstenberger et al., 2020). The reason is that the natural variability of such phenomena is now fully explored by merging the results of a large number of numerical simulations for three volcanic sources, taking into account the impact of low-probability but high-consequence events. In particular, we estimate the mean annual frequency of exceeding specific tephra load thresholds at selected sites in 50 years (but extendible to any time window), considering the mean annual eruption rate from the model of Selva et al. (2022). Notably, this allows to consider also that, for each volcano, the sequences of eruptive clusters with different eruptive-size distributions may occur, also accounting for isolated eruptions and long-term repose times. It is worth noting that the very large magnitude eruptive events: i.e., for Campi Flegrei, events like Neapolitan Yellow Tuff, (e.g. Lirer and Munno, 1975;



Scandone et al., 1991; Orsi et al., 2004); Campanian Ignimbrite; (e.g. Barberi et al., 1978; Costa et al., 2013) are not taken into account because of their negligible probability of occurrence over an exposure time of 50 years (e.g. Bevilacqua et al., 2016; Orsi et al., 2009). However, they would need to be considered if we selected a larger exposure time window. The proposed methodology also represents a clear step forward also into the multi-hazard and risk perspective with respect to the previous PVHAs in response to the need of homogeneous model definitions for an effective comparison among volcanoes and for producing coherent multi-volcano long-term hazard, multiple risk quantifications and risk ranking (i.e. Marzocchi et al., 2015). In doing this, a further challenge is to coordinate the efforts of hazard scientists and decision makers in order to maximize PVHA potential benefit for the society (Selva, 2022).

## 440 5 Conclusions

In this study, we provide a new long-term PVHA of tephra load associated with explosive eruptions from the Somma-Vesuvius, Campi Flegrei, and Ischia volcanoes. By defining a set of different eruption size classes for each volcano (Small, Medium, and Large), we created a synthetic dataset of tephra ground loads composed by a total of 10500 numerical simulations (1500 for each eruption size class) that consider a meteorological variability over the last 30 years. The hazard evaluation was performed through the HPC workflow recently developed by Martínéz Montesinos et al. (2022) accounting for the uncertainty on the eruptive source parameters, vent opening (only for Campi Flegrei) and the mean annual rate of eruption for each eruption and size class (Selva et al., 2022). In this way, we obtained a hazard model from which we derived a set of hazard maps for Southern Italy showing the threshold tephra load that would be exceeded with selected ARPs (i.e., 100, 500, 1000 years) within a 50-years exposure time. As expected, the SSE area of the computational domain is mainly threatened by the tephra fallout hazard, especially in the proximity of the Neapolitan area. By performing hazard disaggregation, we quantified the relative dominance of the three volcanic sources and their eruptive size classes, showing that Somma-Vesuvius gives a major contribution to the total tephra load hazard for most of Southern Italy, compared to Campi Flegrei and Ischia. This is mainly due to its greater mean eruption rate, which is an order of magnitude larger than the ones of the other two volcanoes. Campi Flegrei dominates in the area of the city center of Naples, in which the lower mean annual rate of Campi Flegrei is compensated by the low probability of eruption dispersing tephra toward west in the Napolitan area. Ischia, instead, dominates only locally. On a wider methodological perspective, this study aims to improve the PVHA in areas in proximity of multiple active volcanoes, like Naples, homogeneously cumulating the effect of all existing volcanoes. This produces a robust approach that allows easier comparisons among the different possible eruptive scenarios (e.g., volcano, size, etc.), as well as with those used for seismic phenomena and other natural disasters. Moreover, this approach can be applied to compute tephra fallout hazard in different areas or for different time spans, accounting for less frequent events that can still be significant for hazard assessment.

*Code and data availability.* NetCDF files containing the long term hazard maps data are available in the supplementary material. The codes used for the analysis are available on request by contacting the authors.

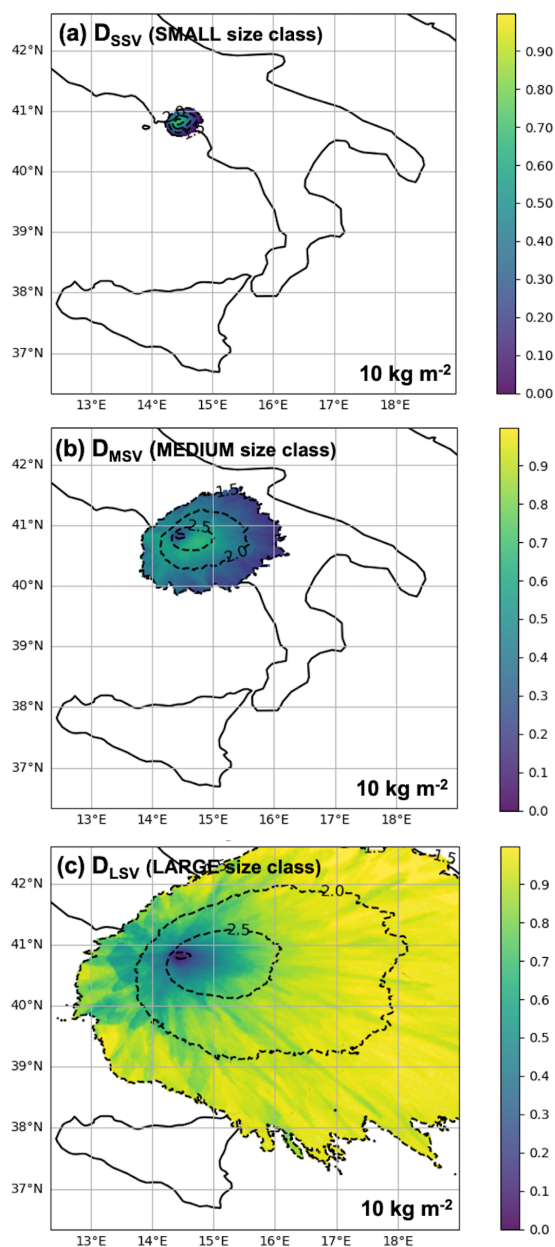

**Figure 9.** Map showing, in each point, which eruption size class of Somma-Vesuvius contributes the most to the hazard of overcoming  $10 \text{ kg m}^{-2}$  due to the occurrence of eruption in 50 years. The relative dominance of overcoming the threshold is accounted for a) Small, b) Medium, c) Large size class. Black dashed contours represent the isolines of  $\log_{10}$  number of simulations that produce a tephra ground load exceeding  $10 \text{ kg m}^{-2}$ .

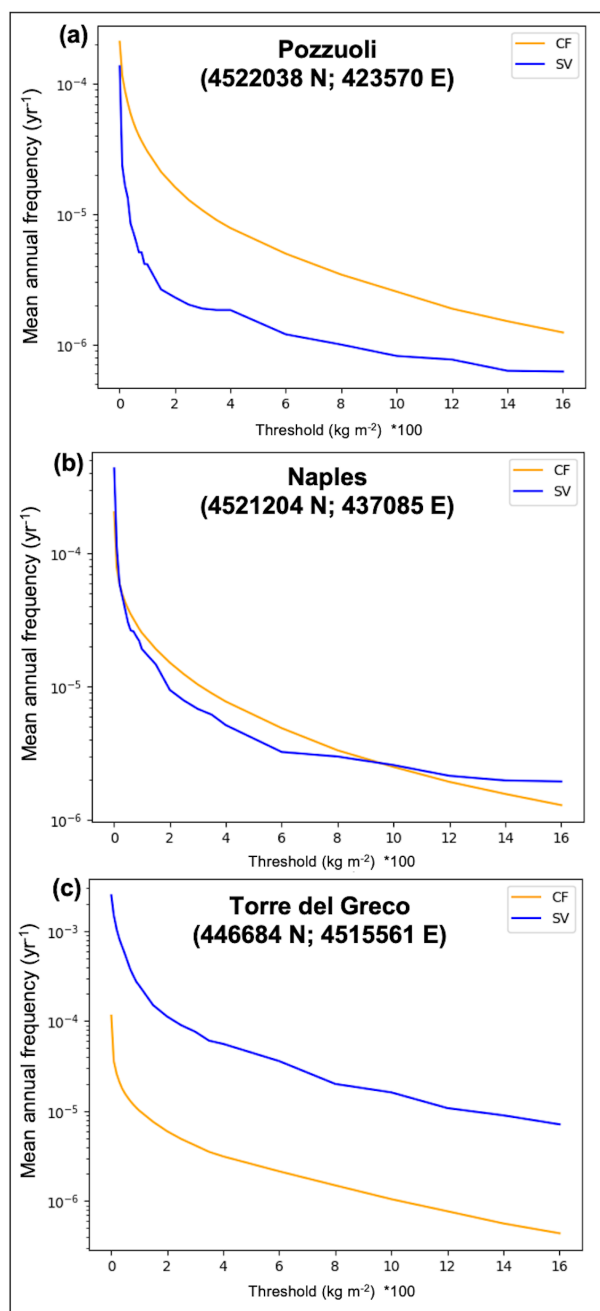

**Figure 10.** Hazard curves showing the mean annual frequency of exceeding a set of intensity thresholds (tephra load, in  $\text{kg m}^{-2}$ ) at three target sites: a) Pozzuoli, b) Municipality of Naples and c) Torre del Greco, due to the impact of Somma-Vesuvius (blue curve) and Campi Flegrei (orange curve), in 50 years.



| Volcano        | Size class | TEM (kg)                                | Fallout mass (kg)                               | Fallout duration (h) | MER (kg s <sup>-1</sup> )                     |
|----------------|------------|-----------------------------------------|-------------------------------------------------|----------------------|-----------------------------------------------|
| Somma-Vesuvius | Small      | 10 <sup>10</sup> – 10 <sup>11</sup>     | 8 × 10 <sup>9</sup> – 8 × 10 <sup>10</sup>      | 11.11 – 87.60        | 2.5 × 10 <sup>4</sup> – 2 × 10 <sup>6</sup>   |
|                | Medium     | 10 <sup>11</sup> – 10 <sup>12</sup>     | 8 × 10 <sup>10</sup> – 8 × 10 <sup>11</sup>     | 6.24 – 11.11         | 2 × 10 <sup>6</sup> – 2 × 10 <sup>7</sup>     |
|                | Large      | 10 <sup>12</sup> – 10 <sup>13</sup>     | 8 × 10 <sup>11</sup> – 8 × 10 <sup>12</sup>     | 6.14 – 6.24          | 2 × 10 <sup>7</sup> – 3.6 × 10 <sup>8</sup>   |
| Campi Flegrei  | Small      | 10 <sup>10</sup> – 10 <sup>11</sup>     | 2.5 × 10 <sup>9</sup> – 2.5 × 10 <sup>10</sup>  | 3.48 – 27.36         | 2.5 × 10 <sup>4</sup> – 1.9 × 10 <sup>5</sup> |
|                | Medium     | 10 <sup>11</sup> – 10 <sup>12</sup>     | 2.5 × 10 <sup>10</sup> – 2.5 × 10 <sup>11</sup> | 1.95 – 3.48          | 1.9 × 10 <sup>6</sup> – 3.6 × 10 <sup>7</sup> |
|                | Large      | 10 <sup>12</sup> – 10 <sup>13</sup>     | 2.5 × 10 <sup>11</sup> – 2.5 × 10 <sup>12</sup> | 1.92 – 1.95          | 3.6 × 10 <sup>7</sup> – 3.6 × 10 <sup>8</sup> |
| Ischia         | Large      | 10 <sup>11</sup> – 3 × 10 <sup>11</sup> | 10 <sup>11</sup> – 3 × 10 <sup>11</sup>         | 2 – 620              | 1.3 × 10 <sup>5</sup> – 1.3 × 10 <sup>7</sup> |

**Table A1.** ESPs for Somma-Vesuvius, Campi Flegrei and Ischia. For each eruption size class, TEM and mass of the fallout phase (kg), duration of the fallout phase (h) and MER (kg s<sup>-1</sup>) are reported.

## Appendix A: Definition and sampling of the Eruptive Source Parameters

Here we report some information about the definition and sampling of the Eruptive Source Parameters (ESPs) for each volcano.

465 The total erupted mass (TEM) and duration of the fallout phase were randomly sampled from uniform distributions with different ranges for each eruption size class (Sandri et al., 2016; Primerano et al., 2021, tab. A1). In this study, we refer to the mass of the fallout phase representing the 80% and 25% of the Total Erupted Mass (TEM) in the case of Somma-Vesuvius and Campi Flegrei, respectively (Sandri et al., 2016). In the case of Ischia, we assume that the TEM associated with the Cretatio Tephra eruption is almost entirely due to a fallout phase (Primerano et al., 2021).

470 For Somma-Vesuvius and Campi Flegrei, the Mass Eruption Rate (MER) is assumed to be constant during the eruption and it was obtained by calculating the ratio between the mass of the fallout phase and its duration. For Ischia, we use the empirical relationship of Mastin et al. (2009) sampling the eruptive column height from a beta distribution ( $\alpha = 2$  and  $\beta = 3$ , scaled with by factor 10 km and translated by 5 km such that  $\bar{H} = 9$  km) within the interval 5 – 15 km (as in Primerano et al., 2021). It is worth noting that in the BET workflow, each simulation is weighted according to a power law which depends on the mass of  
 475 the fallout phase of each eruption size class (Sandri et al., 2016).

Since the dispersion of tephra is strongly influenced by the geometry of the dispersed particles, an accurate characterization of the whole size range of erupted particles is necessary to assign the associated mass and describe the tephra distribution in the proximal-medial areas around the volcano. In this study, TGSD is randomly sampled by a range of values for each size class by assuming a bi-Gaussian distribution (eq. (A1)) for the variable  $\Phi$  (grain size, considering that  $d = 2^{-\Phi}$  is the particle  
 480 diameter in mm):

$$f(\Phi) = p \frac{1}{\sigma_1 \sqrt{2\pi}} e^{-\frac{(\Phi - \mu_1)^2}{2\sigma_1^2}} + (1 - p) \frac{1}{\sigma_2 \sqrt{2\pi}} e^{-\frac{(\Phi - \mu_2)^2}{2\sigma_2^2}} \quad (\text{A1})$$



| Volcano        | Size class | $p$          | $\mu_1$       | $\sigma_1$ | $\mu_2$      | $\sigma_2$   |
|----------------|------------|--------------|---------------|------------|--------------|--------------|
| Somma-Vesuvius | small      | [0.5, 0.6]   | [-2.8, -1.4]  | [1.3, 1.8] | [-0.16, 3.2] | [1, 2.8]     |
|                | medium     | [0.6, 0.8]   | [-1.3, 0.5]   | [2, 3]     | [4, 5.2]     | [0.7, 1.5]   |
|                | large      | [0.7, 0.8]   | [-0.5, 0.5]   | [1, 3]     | [4, 6]       | [0.5, 1.5]   |
| Ischia         | Large      | [0.06, 0.34] | [-2.36, 1.28] | [0.8, 2]   | [3.50, 6.35] | ]1.05, 1.87] |

**Table A2.** Parameters of the Beta distribution best fitting the field-based TGSDs for Campi Flegrei (Mele et al., 2020). In this case, the reported parameters are referred to the juvenile, lithics and crystals;  $p$  and  $(1 - p)$  are, respectively, the coarse and fine sub-population weights;  $\mu_1$ ,  $\mu_2$  and  $\sigma_1$ ,  $\sigma_2$  are the mean and standard deviations of the two Gaussian distributions in  $\Phi$ -units.

where  $p$  and  $1 - p$  are the fine and coarse sub-population weights and  $\mu_1, \sigma_1$  and  $\mu_2, \sigma_2$  are the mean and standard deviation of the two Gaussians respectively. The five parameters of the distribution ( $p, \mu_1, \sigma_1, \mu_2, \sigma_2$ ) are defined for each eruption size class according to what is reported in literature (Poret et al., 2020; Mele et al., 2020; Primerano et al., 2021) and randomly sampled from beta distributions (Tabs. A2, A3). In the case of Ischia, TGSD is estimated following Costa et al. (2016).

For Somma-Vesuvius and Ischia, we consider a bulk class of particles; for Campi Flegrei, the availability of literature data (Mele et al., 2020) allowed Martínéz Montesinos et al. (2022) to consider the representative fractions for juvenile, lithic and crystal components. Juvenile particles are modeled using a bi-Gaussian distribution while lithics and crystals through a Gaussian distribution (Mele et al., 2020).

Tephra particle density is set as follows: from 900 to 2500 kg m<sup>-3</sup> for Somma-Vesuvius (Sandri et al., 2016)[and references therein] and from 740 and 2460 kg m<sup>-3</sup> for Ischia (Primerano et al., 2021). For Campi Flegrei, we distinguished the density of lithics (2500 kg m<sup>-3</sup>) and crystals (2800 kg m<sup>-3</sup>) as in Martínéz Montesinos et al. (2022) considering the estimates provided by Mele et al. (2020).

In Table A4 we report the models and other physical parameters used to run the simulations. For each volcano, the emission source term is modeled considering the Suzuki option (Suzuki, 1983; Pfeiffer et al., 2005) which assumes a mushroom-like vertical distribution of emission points depending on two dimensionless parameters  $\lambda$  and  $A$ . The parameter  $\lambda$ , introduced by Pfeiffer et al. (2005), controls the distribution of the emitted mass around the maximum while  $A$  controls the vertical location of the maximum of the emission profile. For our applications,  $\lambda$  is set to 1 and  $A$  randomly sampled in the range [3, 5].

The aggregation of tephra particles affects the sedimentation dynamics and deposition (Durant et al., 2009; Folch and Sulpizio, 2010, e.g.). FALL3D, besides the option based on the model of Costa et al. (2013), includes some simple a priori aggregation parameterizations consisting of empirically based predefined fractions of aggregating classes being transferred to one or more class of aggregates within the eruptive column (i.e., aggregation is performed before transport). We use the Cornell aggregation model (Cornell et al., 1983) selecting a single tephra bin for Somma-Vesuvius (diameter of 200  $\mu$ m, density sampled within a uniform distribution ([100 – 600 kg m<sup>-3</sup>]) and Ischia (diameter of 200  $\mu$ m, density sampled within a uniform distribution ([50 – 500 kg m<sup>-3</sup>])). For Campi Flegrei, we use the percentage model (Sulpizio et al., 2012) selecting two classes of aggregates for each eruption size class. For accretionary lapilli the diameter is set to 2000  $\mu$ m and density is





| CF eruption size class | Particle | $p$        | $\mu_1$    | $\sigma_1$ | $\mu_2$    | $\sigma_2$ |
|------------------------|----------|------------|------------|------------|------------|------------|
| Small                  | Juvenile | [0.3, 0.5] | [2.7, 4]   | [0.9, 1.5] | [4.9, 5.4] | [1.2, 1.6] |
|                        | Lithics  | [0.3, 0.5] | [-2, -0.5] | [1.4, 1.7] | [4.9, 5.4] | [1.2, 1.6] |
|                        | Crystals | [0.3, 0.5] | [0.1, 0.6] | [0.7, 1.2] | [4.9, 5.4] | [1.2, 1.6] |
| Medium                 | Juvenile | [0.2, 0.4] | [2.7, 4]   | [0.9, 1.5] | [4.9, 5.4] | [1.2, 1.6] |
|                        | Lithics  | [0.2, 0.4] | [-2, -0.5] | [1.4, 1.7] | [4.9, 5.4] | [1.2, 1.6] |
|                        | Crystals | [0.2, 0.4] | [0.1, 0.6] | [0.7, 1.2] | [4.9, 5.4] | [1.2, 1.6] |
| Large                  | Juvenile | [0, 0.3]   | [2.7, 4]   | [0.9, 1.5] | [4.9, 5.4] | [3.5, 5.5] |
|                        | Lithics  | [0, 0.3]   | [-2, -0.5] | [1.4, 1.7] | [4.9, 5.4] | [3.5, 5.5] |
|                        | Crystals | [0, 0.3]   | [0.1, 0.6] | [0.7, 1.2] | [4.9, 5.4] | [3.5, 5.5] |

**Table A3.** Parameters of the Beta-distribution best fitting the field-based TGSDs for Campi Flegrei (Mele et al., 2020). In this case, the reported parameters are referred to the juvenile, lithics and crystals;  $p$  and  $(1 - p)$  are, respectively, the coarse and fine sub-population weights;  $\mu_1$ ,  $\mu_2$  and  $\sigma_1$ ,  $\sigma_2$  are the mean and standard deviations of the two Gaussian distributions in  $\Phi$ -units.

| Parameters                  | Somma-Vesuvius                     | Campi Flegrei                      | Ischia                             |
|-----------------------------|------------------------------------|------------------------------------|------------------------------------|
| Aggregation model           | Cornell                            | Percentage                         | Cornell                            |
| Source type                 | Suzuki $A \in [3, 5], \lambda = 1$ | Suzuki $A \in [3, 5], \lambda = 1$ | Suzuki $A \in [3, 5], \lambda = 1$ |
| Vent latitude ( $^\circ$ )  | 40.82                              | 40.82                              | 40.73                              |
| Vent longitude ( $^\circ$ ) | 14.42                              | 14.13                              | 13.92                              |
| Vent altitude ( m a.s.l.)   | 1281                               | 458                                | 251                                |
| Terminal velocity model     | Ganser                             | Ganser                             | Ganser                             |
| Horizontal turbulence model | CMAQ                               | CMAQ                               | CMAQ                               |
| Vertical turbulence model   | Similarity                         | Similarity                         | Similarity                         |

**Table A4.** Some parameters and models used to run numerical simulations in FALL3D v.8.0.

sampled in the range  $[1000 - 2000 \text{ kg m}^{-3}]$ . For other aggregates, the diameter is set to  $200 \mu\text{m}$  and density varies in the range  $[100 - 600 \text{ kg m}^{-3}]$  (as in Martínéz Montesinos et al., 2022).

## Appendix B: Disaggregation per eruption size class for Campi Flegrei

510 Figure 6 reports the size class disaggregation analysis (see eqn. 5) for Campi Flegrei with a ground load threshold of  $300 \text{ kg m}^{-2}$ . Here we present the same information for the threshold of  $10 \text{ kg m}^{-2}$ .

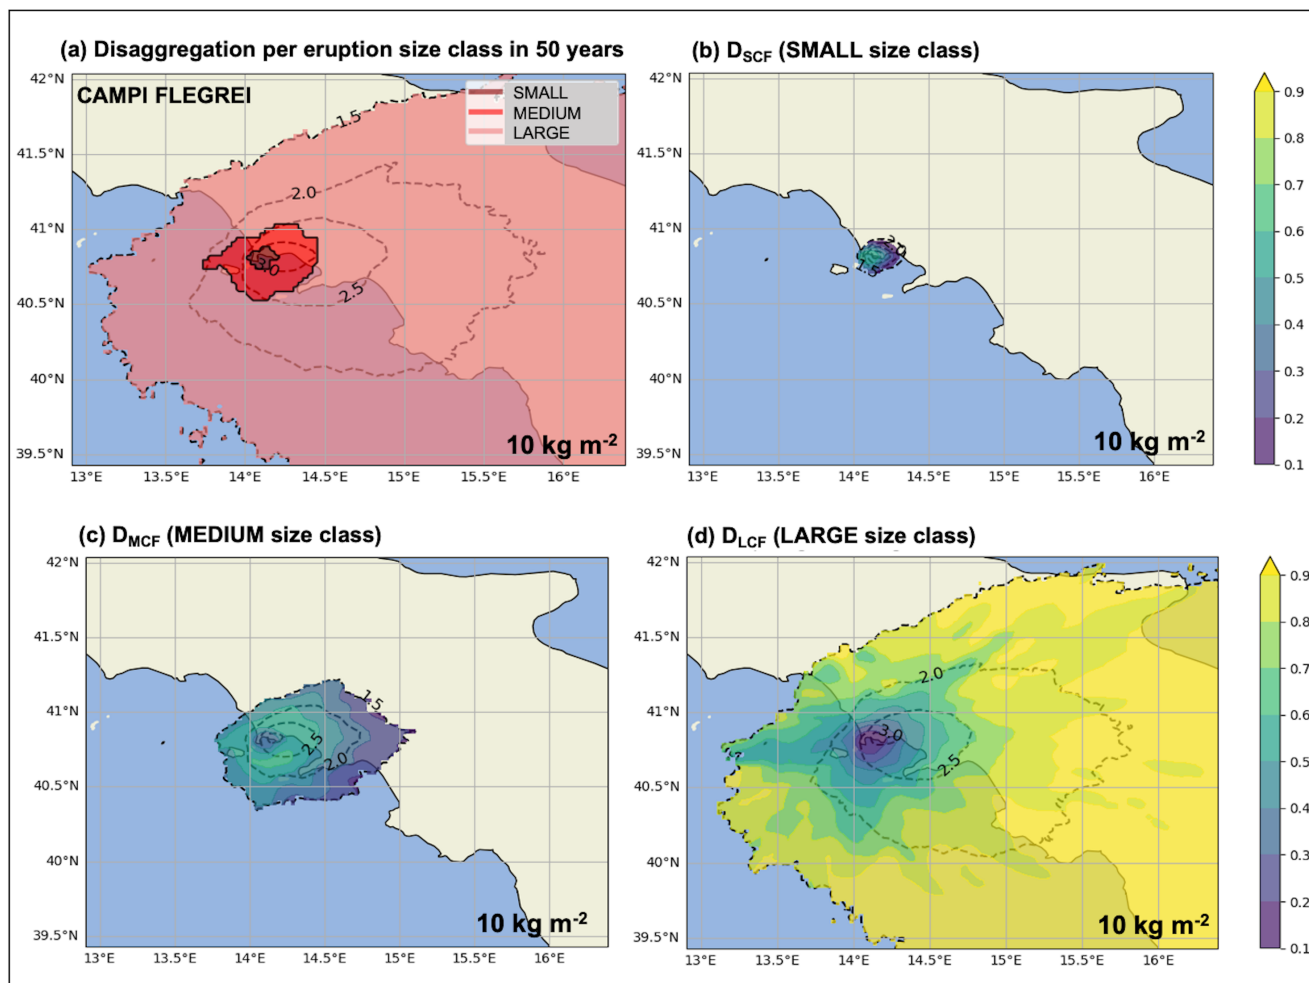

**Figure B1.** Disaggregation per “eruption size class”. a) Map showing, in each point, what eruption size class of Campi Flegrei contributes the most to the hazard of overcoming  $10 \text{ kg m}^{-2}$  due to the occurrence of eruption in 50 years.  $D_{ik}$  of overcoming the threshold is accounted for b) Small, b) Medium and d) Large size class. Black dashed contours represent the isolines of  $\log_{10}$  number of simulations that produce a tephra ground load exceeding the threshold of  $10 \text{ kg m}^{-2}$ .



|                |                                              |                                               |                                              |
|----------------|----------------------------------------------|-----------------------------------------------|----------------------------------------------|
| Somma-Vesuvius | Small<br>$6.0 \times 10^{-3} \text{a}^{-1}$  | Medium<br>$2.08 \times 10^{-3} \text{a}^{-1}$ | Large<br>$7.13 \times 10^{-4} \text{a}^{-1}$ |
| Campi Flegrei  | Small<br>$3.47 \times 10^{-4} \text{a}^{-1}$ | Medium<br>$1.27 \times 10^{-4} \text{a}^{-1}$ | Large<br>$3.9 \times 10^{-4} \text{a}^{-1}$  |
| Ischia         | Small<br>-                                   | Medium<br>-                                   | Large<br>$1.89 \times 10^{-4} \text{a}^{-1}$ |

**Table C1.** Mean annual rates ( $\nu_{ik}$ ) calculated for each eruption size class  $k$  of the Somma-Vesuvius, Campi Flegrei and Ischia, in 50 years;

|                |                                             |                                              |                                             |
|----------------|---------------------------------------------|----------------------------------------------|---------------------------------------------|
| Somma-Vesuvius | Small<br>$5.4 \times 10^{-3} \text{a}^{-1}$ | Medium<br>$2.0 \times 10^{-3} \text{a}^{-1}$ | Large<br>$8.6 \times 10^{-4} \text{a}^{-1}$ |
| Campi Flegrei  | Small<br>$3. \times 10^{-4} \text{a}^{-1}$  | Medium<br>$8.8 \times 10^{-5} \text{a}^{-1}$ | Large<br>$4.7 \times 10^{-5} \text{a}^{-1}$ |
| Ischia         | Small<br>-                                  | Medium<br>-                                  | Large<br>$1.7 \times 10^{-4} \text{a}^{-1}$ |

**Table C2.** Mean annual rates ( $\nu_{ik}$ ) calculated for each eruption size class  $k$  of the Somma-Vesuvius, Campi Flegrei and Ischia, in 5 years;

### Appendix C: Mean annual eruption rates

The mean annual rates presented in this appendix have been used in eq. (3) and have been obtained with the method presented in Selva et al. (2022).

|                |                                             |                                              |                                             |
|----------------|---------------------------------------------|----------------------------------------------|---------------------------------------------|
| Somma-Vesuvius | Small<br>$7.8 \times 10^{-3} \text{a}^{-1}$ | Medium<br>$2.2 \times 10^{-3} \text{a}^{-1}$ | Large<br>$3.2 \times 10^{-4} \text{a}^{-1}$ |
| Campi Flegrei  | Small<br>$9.1 \times 10^{-4} \text{a}^{-1}$ | Medium<br>$3.2 \times 10^{-4} \text{a}^{-1}$ | Large<br>$1.1 \times 10^{-4} \text{a}^{-1}$ |
| Ischia         | Small<br>-                                  | Medium<br>-                                  | Large<br>$4.3 \times 10^{-4} \text{a}^{-1}$ |

**Table C3.** Mean annual rates ( $\nu_{ik}$ ) calculated for each eruption size class  $k$  of the Somma-Vesuvius, Campi Flegrei and Ischia, in 500 years;



515 *Author contributions.* AC, LS, JS, RS, contributed to the conceptualization and design of the study, analysis and/or interpretation of data, and drafting the manuscript. BM, SM, MS, LS, JS, AC and MT contributed to coding the scripts and software, analysis and/or interpretation of data. SM, MS, BM drafted the manuscript. BG, MM, ED, MN, RI, GN and PD contributed to the interpretation of the results. AC coordinated the study. All the authors revised the submitted version of the manuscript.

520 *Competing interests.* No one of the (co-)authors is a member of the editorial board of *Natural Hazards and Earth System Sciences*. The authors also have no other competing interests to declare.

*Disclaimer.* Publisher's note: Copernicus Publications remains neutral with regard to jurisdictional claims in published maps and institutional affiliations.

525 *Acknowledgements.* We thank the European Union's Horizon 2020 research and innovation program. We thank the PRACE partnership. We thank TGCC France. We thank Copernicus Climate Change Service (C3S) (2017): ERA5: Fifth generation of ECMWF atmospheric reanalyses of the global climate. Copernicus Climate Change Service Climate Data Store (CDS) date of access for the access to the meteorological data. MS would like to thank Stefano Cacciaguerra for the academic and personal support.

530 *Financial support* The research leading to these results was supported by the Italian Department for Civil Protection of the Presidency of Council of Ministers within the "Contratto concernente l'affidamento di servizi per il programma per il supporto al rafforzamento della Governance in materia di riduzione del rischio sismico e vulcanico ai fini di protezione civile nell'ambito del PON Governance e Capacità Istituzionale 2014-2020 - CIG6980737E65. The simulations for Campi Flegrei were supported by the European Commission's CORDIS [ChEESE (grant no. 823844)], and the computational resources were provided within the Multi-year PRACE Project Access "Volcanic ash hazard and forecast" (ID 2019215114). This part of work was granted access to the HPC/AI resources of TGCC under the allocation 2020-RA2020235114 made by GENCI. SM was also supported by the PON Research and Innovation 2014/2020 project referring to "Research contracts on Green topics" 535 (CODICE CUP H95F21001440006). MS was also supported by the PNIR - Programma Nazionale Infrastrutture di Ricerca with the CIR01\_00013 project.



## References

- Albert, P. G., Giaccio, B., Isaia, R., Costa, A., Niespolo, E., Nomade, S., Pereira, A., Renne, P. R., Hinchliffe, A., Mark, D. F., Brown, R. J., and Smith, V. C.: Evidence for a large-magnitude eruption from Campi Flegrei caldera (Italy) at 29 ka, *Geology*, 47, 595–599, <https://doi.org/10.1130/G45805.1>, 2019.
- Alderton, D. and Elias, S. A.: *Encyclopedia of Geology* (Second edition), Academic Press, Elsevier, 2020.
- Andronico, D. and Cioni, R.: Contrasting styles of Mount Vesuvius activity in the period between the Avellino and Pompeii Plinian eruptions, and some implications for assessment of future hazards, *Bulletin of Volcanology*, 64, 372–391, <https://doi.org/doi.org/10.1007/s00445-002-0215-4>, 2002.
- Arrighi, S., Principe, C., and Rosi, M.: Violent strombolian and subplinian eruptions at Vesuvius during post-1631 activity, *Bulletin of Volcanology*, 63, 126–150, <https://doi.org/10.1007/s004450100130>, 2001.
- Aspinall, W., Auker, M., Hincks, T., Mahony, S., Pooley, J., Nadim, F., Syre, E., Sparks, R., and Bank, T.: *Volcano hazard and exposure in Track II countries and risk mitigation measures - GFDRR volcano Risk Study*, 309, The world bank, 2011.
- Auker, M. R., Sparks, S., Jenkins, S., Aspinall, W., Brown, S. K., Deligne, N. I., Jolly, G., Loughlin, S., Marzocchi, W., Newhall, C., and Palma, J. L.: *Global volcanic hazard and risk*, chap. Development of a new global Volcanic Hazard Index (VHI), Cambridge University Press, 2015.
- Barberi, F., Innocenti, F., Lirer, L., Munno, R., Pescatore, T., and Santacroce, R.: The campanian ignimbrite: a major prehistoric eruption in the Neapolitan area, *Bulletin Volcanologique*, pp. 10–31, 1978.
- Barberi, F., Coltelli, M., Frullani, A., Rosi, M., and Almeida, E.: Chronology and dispersal characteristics of recently (last 5000 years) erupted tephra of Cotopaxi (Ecuador): implications for long-term eruptive forecasting, *Journal of Volcanology and Geothermal Research*, 69, 217–239, [https://doi.org/10.1016/0377-0273\(95\)00017-8](https://doi.org/10.1016/0377-0273(95)00017-8), 1995.
- Bazzurro, P. and Cornell, C. A.: Disaggregation of seismic hazard, *Bulletin of the Seismological Society of America*, 89, 501–520, <https://doi.org/10.1785/BSSA0890020501>, 1999.
- Bevilacqua, A., Flandoli, F., Neri, A., Isaia, R., and Vitale, S.: Temporal models for the episodic volcanism of Campi Flegrei caldera (Italy) with uncertainty quantification, *Journal of Geophysical Research: Solid Earth*, 121, 7821–7845, <https://doi.org/10.1002/2016JB013171>, 2016.
- Biass, S., Scaini, C., Bonadonna, C., Folch, A., Smith, K. T., and Hoskuldsson, A.: *A multi-scale risk assessment for tephra fallout and airborne concentration from multiple Icelandic volcanoes - Part 1: Hazard assessment*, 2014.
- Blong, R.: *Volcanic Hazards: A Sourcebook on the effects of eruptions*, 76, 113–115, <https://doi.org/10.2307/214795>, 1984.
- Bonadonna, C., Biass, S., Menoni, S., and Gregg, C.: *Assessment of risk associated with tephra-related hazards*, Elsevier (Hazards and Disasters), 2021.
- Casadevall, T. J.: The 1989-1990 eruption of Redoubt Volcano, Alaska: impacts on aircrafts operations, *Journal of Volcanology and Geothermal Research*, 62, 301–316, [https://doi.org/10.1016/0377-0273\(94\)90038-8](https://doi.org/10.1016/0377-0273(94)90038-8), 1994.
- Cioni, R., Santacroce, R., and Sbrana, A.: Pyroclastic deposit as a guide for reconstructing the multi-stage evolution of the Somma-Vesuvius Caldera, *Bulletin of Volcanology*, 61, 207–222, <https://doi.org/10.1007/s004450050272>, 1999.
- Cioni, R., Longo, A., Macedonio, G., Santacroce, R., Sbrana, A., Sulpizio, R., and Andronico, D.: Assessing pyroclastic fall hazard through field data and numerical simulations: Example from Vesuvius, *Chemistry and Physics of Minerals and Rock/Volcanology*, 108, <https://doi.org/10.1029/2001JB000642>, 2003.



- Cioni, R., Bertagnini, A., Santacroce, R., and Andronico, D.: Explosive activity and eruption scenarios a Somma-  
575 Vesuvius (Italy): Towards a new classification scheme, *Journal of Volcanology and Geothermal Research*, 178, 33–346,  
<https://doi.org/10.1016/j.jvolgeores.2008.04.024>, 2008.
- Civetta, L. and Gallo, Gabriella ad Orsi, G.: Sr- and Nd-isotope and trace-element constraints on the chemical evolution of the magmatic  
system of Ischia (Italy) in the last 55 ka, *Journal of Volcanology and Geothermal Research*, 46, 213–230, [https://doi.org/10.1016/0377-0273\(91\)90084-D](https://doi.org/10.1016/0377-0273(91)90084-D), 1991.
- 580 Cole, P. D. and Scarpato, P.: The 1944 eruption of Vesuvius, Italy: combining contemporary accounts and field studies for a new volcanological  
reconstruction, *Geological Magazine*, 147, 391–415, <https://doi.org/10.1017/S0016756809990495>, 2010.
- Constantinescu, R., Robertson, R., Lindsay, J. M., Tonini, R., Sandri, L., Rouwet, D., Smith, P., and Stewart, R.: Application of the proba-  
bilistic model BET\_UNREST during a volcanic unrest simulation exercise in Dominica, Lesser Antilles, *Geochemistry, Geophysics and  
Geosystems*, 17, 4438–4456, 2016.
- 585 Cornell, C. A.: Engineering seismic risk analysis, *Bulletin of the seismological society of America*, 58, 1583–1606, 1968.
- Cornell, W., Carey, S., and Sigurdsson, H.: Computer simulation of transport and deposition of the campanian Y-5 ash, *Journal of Volcanology  
and Geothermal Research*, 17, [https://doi.org/10.1016/0377-0273\(83\)90063-X](https://doi.org/10.1016/0377-0273(83)90063-X), 1983.
- Costa, A., Dell’Erba, F., Di Vito, M. A., Isaia, R., Macedonio, G., Orsi, G., and Pfeiffer, T.: Tephra fallout hazard assessment at the Campi  
Flegrei caldera (Italy), *Bulletin of Volcanology*, 71, 2009.
- 590 Costa, A., Folch, A., and Macedonio, G.: Density-driven transport in the umbrella region of volcanic clouds: Implications for tephra dispersion  
models, *Geophysical research Letters*, 40, 4823–4827, 2013.
- Costa, A., Pioli, L., and Bonadonna, C.: Assessing tephra total grain-size distribution: Insights from field data analysis, *Earth and Planetary  
Science Letters*, 443, 90–107, <https://doi.org/10.1016/j.epsl.2016.02.040>, 2016.
- Costa, A., Di Vito, M. A., Ricciardi, G. P., Smith, V. C., and Talamo, P.: The long and intertwined record of humans and the Campi Flegrei  
595 volcano (Italy), *Bulletin of Volcanology*, 84, 2022.
- de Vita, S., Orsi, G., Civetta, L., Caradente, A., D’Antonio, M., Deino, A. L., di Cesare, T., di Vito, M. A., Fisher, R. V., Isaia, R., Marotta,  
E., Necco, A., Ort, M. H., Pappalardo, L., Piochi, M., and Southon, J. R.: The Agnano-Monte Spina eruption (4100 years BP) in the  
restless Campi Flegrei caldera (Italy), *Journal of Volcanology and Geothermal Research*, 91, 269–301, [https://doi.org/10.1016/S0377-0273\(99\)00039-6](https://doi.org/10.1016/S0377-0273(99)00039-6), 1999.
- 600 de Vita, S., Sansiviero, F., Orsi, G., Marotta, E., and Piochi, M.: Volcanological and structural evolution of the Ischia resurgent caldera (Italy)  
over the past 10ky, *Geological Society of America*, 2010.
- De Vivo, B., G., R., and Gans, P.: New constraints on the pyroclastic eruptive history of the Campanian volcanic plain (Italy), *Mineralogy  
and Petrology*, 73, 47–65, 2001.
- Deino, A. L., Orsi, G., de Vita, S., and Piochi, M.: The age of Neapolitan Yellow Tuff caldera-forming eruption (Campi Flegrei  
caldera - Italy) assessed by  $^{40}\text{Ar}/^{39}\text{Ar}$  dating method, *Journal of Volcanology and Geothermal Research*, 133, 157 – 170, [https://doi.org/10.1016/S0377-0273\(03\)00396-2](https://doi.org/10.1016/S0377-0273(03)00396-2), 2004.
- Di Vito, M. A., Isaia, R., Orsi, G., Southon, J. R., de Vita, S., D’Antonio, M., Pappalardo, L., and Piochi, M.: Volcanism and de-  
605 formation since 12,000 years at the Campi Flegrei caldera (Italy), *Journal of Volcanology and Geothermal Research*, 91, 221–246,  
[https://doi.org/10.1016/S0377-0273\(99\)00037-2](https://doi.org/10.1016/S0377-0273(99)00037-2), 1999.
- Di Vito, M. A., Arienzo, I., Braia, G., Civetta, L., D’Antonio, M., Di Renzo, V., and Orsi, G.: The Averno 2 fissure eruption: a recent small-size  
explosive event at the Campi Flegrei Caldera (Italy), *Bulletin of Volcanology*, 73, 295–320, 2011.



- Dipartimento di Protezione Civile: Aggiornamento del Piano nazionale di protezione civile per il Vesuvio, <https://www.protezionecivile.gov.it/it/approfondimento/aggiornamento-del-piano-nazionale-di-protezione-civile-il-vesuvio>, 2019.
- Durant, A., Rose, W., Sarna-Wojcicki, A., Carey, S., and Volentik, A.: Hydrometeor-enhanced tephra sedimentation: Constraints from the 18 May 1980 eruption of Mount St. Helens, *Journal of Geophysical Research: Solid Earth*, 114, <https://doi.org/10.1029/2008JB005756>, 2009.
- Folch, A. and Sulpizio, R.: Evaluating long-range volcanic ash hazard using supercomputing facilities: application to Somma-Vesuvius (Italy), and consequences for civil aviation over the Central Mediterranean area, *Bulletin of Volcanology*, 72, 1039–1059, 2010.
- Folch, A., Mingari, L., Gutierrez, N., Hanzich, M., Macedonio, G., and Costa, A.: FALL3D-8.0: a computational model for atmospheric transport and deposition of particles and radionuclides - Part 1: Model physics and numerics, *Geoscientific Model Development*, 13, 1431–1458, <https://doi.org/10.5194/gmd-13-1431-2020>, 2020.
- Freire, S., Florczyk, A. J., Pesaresi, M., and Sliuraz, R.: An improved global analysis of population distribution in proximity to active volcanoes, 1975–2015, *ISPRS International Journal of Geo-Information*, 8, <https://doi.org/10.3390/ijgi8080341>, 2019.
- Gerstenberger, M. C., Marzocchi, W., Allen, T., Pagani, M., Adams, J., Danciu, L., Field, E., Fujiwara, H., Luco, N., Meletti, C., and Petersen, M.: Probabilistic Seismic Hazard Analysis at Regional and National Scales: State of the Art and Future Challenges, *Reviews of Geophysics*, 58, <https://doi.org/10.1029/2019RG000653>, 2020.
- Giaccio, B., Hajdas, I., Isaia, R., Deino, A., and Nomade, S.: High-precision  $^{14}\text{C}$  and  $^{40}\text{Ar}/^{39}\text{Ar}$  dating of the Campanian Ignimbrite ( $Y - 5$ ) reconciles the timescales of climatic – cultural processes at 40ka, *Scientific Reports*, 7, 1 – 10, 2017.
- Grezio, A., Babeyko, A., Baptista, M. A., Behrens, J., Costa, A., Davies, G., Geist, E. L., Glimsdal, S., Gonzales, F. I., Griffin, J., Harbitz, C. B., LeVeque, R. J., Lorito, S., Lohvold, F., Omira, R., Mueller, C., Paris, R., Parsons, T., Polet, J., Power, W., Selva, J., Sorensen, M. B., and Thio, H. K.: Probabilistic tsunami hazard analysis: multiple sources and global application, *Reviews of Geophysics*, 55, 1158–1198, 2017.
- Hersbach, H., Bell, B., Berrisford, B., Biavati, P., Horányi, A., Muñoz Sabater, J., Nicolas, J., Peubey, C., Radu, R., Rozum, I., Schepers, D., Simmons, A., Soci, C., Dee, D., and Thépaut, J.: ERA5 hourly data on pressure levels from 1959 to present, <https://doi.org/10.24381/cds.bd0915c6>, accessed between 01/01/2020 and 31/10/2021, 2018.
- Jenkins, S. F., Biass, S., Williams, G. T., Hayes, J. L., Tennant, E., Yang, Quingyuan, Y., Burgos, V., Meredith, A., Linor S. ad Lerner, G. A., Syarifuddin, M., and Verolino, A.: Evaluating and ranking Southeast Asia’s exposure to explosive volcanic hazard, *Natural Hazards Earth System Science*, 22, 1233–1265, <https://doi.org/10.5194/nhess-22-1233-2022>, 2022.
- Jenkins, S. J., Wilson, T., Magill, C., Steward, C., Blong, R., Marzocchi, W., Boulton, M., Bonadonna, C., and Costa, A.: Global volcanic hazard and risk, chap. Volcanic ash fall hazard and risk, Cambridge University Press, 2015.
- Lirer, L. and Munno, R.: Il tufo giallo napoletano (Campi Flegrei), *Period Mineral*, pp. 103–118, 1975.
- Loughlin, S. C., Sparks, S., Brown, S. K., Jenkins, S. F., and Vye-Brown, C., eds.: Global volcanic hazard and risk, Cambridge University Press, 2015.
- Macedonio, G., Costa, A., and Folch, A.: Ash fallout scenarios at Vesuvius: Numerical simulations for hazard assessment, *Journal of Volcanology and Geothermal Research*, 178, 366–377, <https://doi.org/10.1016/j.jvolgeores.2008.08.014>, 2008.
- Macedonio, G., Costa, A., Scollo, S., and Neri, A.: Ash fallout scenarios at Vesuvius: numerical simulations and implications for hazard assessment: example from Vesuvius (Italy), *Journal of Applied Volcanology*, 5, 1–19, 2016.
- Martinéz Montesinos, B., Titos Luzón, M., Sandri, L., Oleksandr, R., Cheptov, A., Macedonio, G., Folch, A., Barsotti, S., Selva, J., and Costa, A.: On the feasibility and usefulness of high-performance computing in probabilistic volcanic hazard assessment: An application to tephra hazard from Campi Flegrei, *Frontiers in Earth Sciences*, 2022.



- Marzocchi, W. and Bebbington, M. S.: Probabilistic eruption forecasting at short and long time scales, *Bulletin of Volcanology*, 74, 1777–1805, 645 <https://doi.org/10.1007/s00445-012-0633-x>, 2012.
- Marzocchi, W., Sandri, L., Gasparini, P., Newhall, C., and Boschi, E.: Quantifying probabilities of volcanic events: The example of volcanic hazard at Mount Vesuvius, *Journal of Geophysical research: Solid Earth*, 109, <https://doi.org/10.1029/2004JB003155>, 2004.
- Marzocchi, W., Sandri, L., and Selva, J.: BET\_EF: a probabilistic tool for long- and short-term eruption forecasting, *Bulletin of Volcanology*, 70, 623–632, <https://doi.org/10.1007/s00445-007-0157-y>, 2007.
- 650 Marzocchi, W., Sandri, L., and Selva, J.: BET\_VH: a probabilistic tool for long-term volcanic hazard assessment, *Bulletin of Volcanology*, 72, 705–716, <https://doi.org/10.1007/s00445-010-0357-8>, 2010.
- Marzocchi, W., Selva, J., Costa, A., Sandri, a., Tonini, R., and Macedonio, G.: *Global volcanic hazard and risk*, chap. Tephra fall hazard for the Neapolitan area, Cambridge University Press, 2015.
- Marzocchi, W., Selva, J., and Jordan, T. H.: A unified probabilistic framework for volcanic hazard and eruption forecasting, *Natural Hazards* 655 *and Earth System Science*, 2021.
- Massaro, S., Rossi, E., Sandri, L., Bondadonna, C., Selva, j., Moretti, R., and Komorowski, J.-C.: Assessing hazard and potential impact associated with volcanic ballistic projectiles: The example of la Soufrière de Guadeloupe volcano (Lesser Antilles), *Journal of Volcanology and Geothermal Research*, 423, <https://doi.org/10.1016/j.jvolgeores.2021.107453>, 2022.
- Mastin, L. G., Guffanti, M., Servranckx, R., Webley, P. W., Barsotti, S., Dean, K. G., Durant, A. J., Ewert, J. W., Neri, A., Rose, W. I., Schneider, 660 D. J., Siebert, Lee and Stunder, B. J., Swanson, G. L., Tupper, A. C., Volentik, A. C. M., and Waythomas, C. F.: A multidisciplinary effort to assign realistic source parameters to models of volcanic ash-cloud transport and dispersion during eruptions, *Journal of Volcanology and Geothermal Research*, 186, 10–21, <https://doi.org/10.1016/j.jvolgeores.2009.01.008>, 2009.
- Mele, D., Dellino, P., Sulpizio, R., and Braia, G.: A systematic investigation on the aerodynamics of ash particles, *Journal of Volcanology and Geothermal Research*, 2011.
- 665 Mele, D., Costa, A., Dellino, P., Sulpizio, R., Dioguardi, F., Isaia, R., and Macedonio, G.: Total grain size distribution of components of fallout deposits and implications on magma fragmentation mechanisms: examples from Campi Flegrei caldera (Italy), *Bulletin of Volcanology*, 82, <https://doi.org/10.1007/s00445-020-1368-8>, 2020.
- Menoni, S., Molinari, D., Parker, D., Ballio, F., and Tapsell, S.: Assessing multifaceted vulnerability and resilience in order to design risk-mitigation, *Natural Hazards*, 64, 2057–2082, <https://doi.org/10.1007/s11069-012-0134-4>, 2012.
- 670 Miller, T. P. and J., C. T.: *Encyclopedia of Volcanoes*, chap. Volcanic ash hazards to aviation, Elsevier, 2000.
- Mingari, L., Folch, A., Prata, A. T., Pardini, F., Macedonio, G., and Costa, A.: Data assimilation of volcanic aerosol observations using FALL3D+PDAF, *Atmospheric Chemistry and Physics*, 22, 1773–1792, <https://doi.org/10.5194/acp-22-1773-2022>, 2022.
- Newhall, C. and Hobblit, R.: Constructing event trees for volcanic crises, *Bulletin of Volcanology*, 64, <https://doi.org/10.1007/s004450100173>, 2002.
- 675 OpenStreetMap contributors: Planet dump retrieved from <https://planet.osm.org> , <https://www.openstreetmap.org>, 2022.
- Orsi, G., Gallo, G., and Zanchi, A.: Simple-shearing block resurgence in caldera depressions. A model from Pantelleria and Ischia, *Journal of Volcanology and Geothermal Research*, 47, 1–11, [https://doi.org/10.1016/0377-0273\(91\)90097-J](https://doi.org/10.1016/0377-0273(91)90097-J), 1991.
- Orsi, G., D'Antonio, M., de Vita, S., and Gallo, G.: The Neapolitan Yellow Tuff, a large-magnitude trachytic phreatoplinian eruption: eruptive dynamics, magma withdrawal and caldera collapse, *Journal of Volcanology and Geothermal Research*, 53, 275–287, 680 [https://doi.org/10.1016/0377-0273\(92\)90086-S](https://doi.org/10.1016/0377-0273(92)90086-S), 1992.





- Orsi, G., De Vita, S., and Di Vito, M.: The restless, resurgent Campi Flegrei nested caldera (Italy): constraints on its evolution and configuration, *Journal of Volcanology and Geothermal Research*, 74, 179–214, [https://doi.org/10.1016/S0377-0273\(96\)00063-7](https://doi.org/10.1016/S0377-0273(96)00063-7), 1996.
- Orsi, G., Di Vito, M. A., and Isaia, R.: Volcanic hazard assessment at the restless Campi Flegrei caldera, *Bulletin of Volcanology*, 66, 514–530, <https://doi.org/10.1007/s00445-003-0336-4>, 2004.
- 685 Orsi, G., Di Vito, M. A., Selva, J., and Marzocchi, W.: Long-term forecast of eruption style and size at Campi Flegrei caldera (Italy), *Earth and Planetary Science Letters*, 287, 265–276, <https://doi.org/10.1016/j.epsl.2009.08.013>, 2009.
- Pareschi, M. T., Cavarra, L., Favalli, M., Giannini, F., and Meriggi, A.: *Natural Hazards*, chap. GIS and Volcanic Risk, Springer, 2000.
- Pfeiffer, T., Costa, A., and Macedonio, G.: A model for the numerical simulation of tephra fall deposit, *Journal of Volcanology and Geothermal Research*, 140, 273–294, <https://doi.org/10.1016/j.jvolgeores.2004.09.001>, 2005.
- 690 Poret, M., Di Donato, M., Costa, A., Sulpizio, R., Mele, D., and Lucchi, F.: Characterizing magma fragmentation and its relationship with eruptive styles of Somma-Vesuvius Volcano (Naples, Italy), *Journal of Volcanology and Geothermal Research*, 393, <https://doi.org/10.1016/j.jvolgeores.2019.106683>, 2020.
- Primerano, P., Giordano, G., Costa, A., de Vita, S., and Di Vito, M. A.: Reconstructing fallout features and dispersal of Cretaceous Tephra (Ischia Island, Italy) through field data analysis and numerical modelling: Implications for hazard assessment, *Journal of Volcanology and Geothermal Research*, 415, <https://doi.org/10.1016/j.jvolgeores.2021.107248>, 2021.
- 695 Rampino, M. and Self, S.: *Encyclopedia of Volcanoes*, chap. Volcanism and biotic extinctions, Elsevier, 2000.
- Rosi, M., Principe, C., and Vecchi, R.: The 1631 Vesuvius eruption. A reconstruction based on historical and stratigraphical data, *Journal of Volcanology and Geothermal Research*, 58, 151–182, [https://doi.org/10.1016/0377-0273\(93\)90106-2](https://doi.org/10.1016/0377-0273(93)90106-2), 1993.
- Sandri, Laura and Jolly, G., Lindsay, J., Howe, T., and Marzocchi, W.: Combining long- and short-term probabilistic volcanic hazard assessment with cost-benefit analysis to support decision making in a volcanic crisis from the Auckland Volcanic Field, New Zealand, *Bulletin of Volcanology*, 74, 7005–723, <https://doi.org/10.1007/s00445-011-0556-y>, 2012.
- 700 Sandri, L., Tonini, R., Rouwet, D., Constantinescu, R., Mendoza-Rosas, A. T., Andrade, D., and Bernard, B.: Volcanic Unrest, chap. The need to quantify hazard related to Non-magmatic unrest: from BET\_EF to BET\_UNREST.
- Sandri, L., Thouret, J.-C., Constantinescu, R., Biass, S., and Tonini, R.: Long-term multi-hazard assessment for El Misti volcano (Perù), *Bulletin of Volcanology*, 76, 2014.
- 705 Sandri, L., Costa, A., Selva, J., Tonini, R., Macedonio, G., Folch, A., and Sulpizio, R.: Beyond eruptive scenarios: assessing long term tephra fallout hazard assessment from Neapolitan volcanoes, *Scientific Reports*, 6, <https://doi.org/10.1038/srep24271>, 2016.
- Sandri, L., Tierz, P., Costa, A., and Marzocchi, W.: Probabilistic hazard from pyroclastic density currents in the Neapolitan area (Southern Italy), *Journal of Geophysical Research: Solid Earth*, 123, <https://doi.org/10.1002/2017JB014890>, 2018.
- 710 Santacroce, R.: *Somma-Vesuvius, Quaderni de la Ricerca Scientifica*, 1987.
- Santacroce, R., Cioni, R., Marianelli, P., Sbrana, A., Sulpizio, Roberto and Zanchetta, G., Donahue, D. J., and Joron, J. L.: Age and whole rock-glass compositions of proximal pyroclastic from the major explosive eruptions of Somma-Vesuvius: a review as a tool for distal tephrostratigraphy, *Journal of Volcanology and Geothermal Research*, 177, 1–18, <https://doi.org/10.1016/j.jvolgeores.2008.06.009>, 2008.
- Sbrana, A. and Toccaceli, R.: *Carta Geologica della Regione Campania - Foglio 464 - Isola di Ischia*, 216 pp + 1 carta: 10.000, 2011.
- 715 Sbrana, A., Marianelli, P., and Pasquini, G.: Volcanology of Ischia (Italy), *Journal of Maps*, 14, 494–503, <https://doi.org/10.1080/17445647.2018.1498811>, 2018.
- Scandone, R., Bellucci, F., Lirer, L., and Rolandi, G.: The structure of the Campanian Plain and the activity of the Neapolitan volcanoes (Italy), *Journal of Volcanology and Geothermal Research*, 48, 1–31, [https://doi.org/10.1016/0377-0273\(91\)90030-4](https://doi.org/10.1016/0377-0273(91)90030-4), 1991.



- Selva, J.: Challenges in uncertainty treatment in volcanic hazard analyses, invited Lecture at Cities on Volcanoes, 11 Conference, 2022. Heraklion (Crete, Greece), 2022.
- Selva, J., Costa, A., Marzocchi, W., and Sandri, L.: BET\_VH: exploring the influence of natural uncertainties on long-term hazard from tephra fallout at Campi Flegrei (Italy), *Bulletin of Volcanology*, 72, 717–733, <https://doi.org/10.1007/s00445-010-0358-7>, 2010.
- Selva, J., Orsi, G., Di Vito, M. A., Marzocchi, W., and Sandri, L.: Probability hazard map for future vent opening at the Campi Flegrei caldera, Italy, *Bulletin of Volcanology*, 74, 497–510, <https://doi.org/10.1007/s00445-011-0528-2>, 2012.
- Selva, J., Costa, A., Sandri, Laura Macedonio, G., and Marzocchi, W.: Probabilistic short-term volcanic hazard in phases of unrest: A case study for tephra fallout, *Journal of Geophysical Research: Solid Earth*, 119, 8805–8826, <https://doi.org/10.1002/2014JB011252>, 2014.
- Selva, J., Costa, A., De Natale, G., Di Vito, M. A., Isaia, R., and Macedonio, G.: Sensitivity test and ensemble hazard assessment for tephra fallout at Campi Flegrei, Italy, 2018.
- Selva, J., Acocella, V., Bisson, M., Caliro, S., Costa, A., Della Seta, M., De Martino, P., de Vita, S., Federico, C., Giordano, G., Martino, S., and Cardaci, C.: Multiple natural hazards at volcanic islands: a review for the Ischia volcano (Italy), *Journal of Applied Volcanology*, 8, <https://doi.org/10.1186/s13617-019-0086-4>, 2019.
- Selva, J., Sandri, L., Taroni, M., Sulpizio, R., Tierz, P., and Costa, A.: A simple two-state model interprets temporal modulations in eruptive activity and enhances multivolcano hazard quantification, *Sciences Advances*, 8, <https://doi.org/10.1126/sciadv.abq4415>, 2022.
- Sevink, J., van Bergen, M. J., van der Plicht, J., Feiken, H., Anastasia, C., and Huizinga, A.: Robust date for the Bronza Age Avellino eruption (Somma-Vesuvius):  $3945 \pm 10$  calBP ( $1995 \pm 10$  calBC), *Quaternary Science Reviews*, 30, 1035–1046, <https://doi.org/10.1016/j.quascirev.2011.02.001>, 2011.
- Sigurdsson, H. and Carey, S.: The Natural History of Pompeii, chap. The Eruption of Vesuvius in A.D: 79, pp. 332–387, Oxford University Press, 1985.
- Small, C. and Naumann, T.: The global distribution of human population and recent volcanism, *Global Environmental Change Part B: Environmental Hazards*, 3, 93–109, <https://doi.org/10.3763/ehaz.2001.0309>, 2001.
- Spence, R. J., Kelman, I., Baxter, P. J., Zuccaro, G., and Petrazzuoli, S. M.: Residential building and occupant vulnerability to tephra fall, *Natural Hazards and Earth System Sciences*, 5, 477–494, 2005.
- Sulpizio, R., Mele, D., Dellino, P., and La Volpe, L.: A complex, Subplinian-type eruption from low-viscosity, phonolitic to tephri-phonolitic magma: the AD 472 (Pollena) eruption of Somma-Vesuvius, Italy, *Bulletin of Volcanology*, pp. 743–767, <https://doi.org/10.1007/s00445-005-0414-x>, 2005.
- Sulpizio, R., Zanchetta, G., Demi, F., Di Vito, M. A., Pareschi, M. T., and Santacroce, R.: Neogene-Quaternary continental marine volcanism: A perspective from México, chap. The Holocene syneruptive volcanoclastic debris flows in the Vesuvian area: Geological data as a guide for hazard assessment, The Geological Society of America, 2006.
- Sulpizio, R., Bonasia, R., Dellino, P., Mele, D., Di Vito, M. A., and La Volpe, L.: The Pomice di Avellino eruption of Somma-Vesuvius (3.9 ka BP). Part II: sedimentology and physical volcanology of pyroclastic density current deposits, *Bulletin of Volcanology*, 72, 559–577, <https://doi.org/10.1007/s00445-009-0340-4>, 2010.
- Sulpizio, R., Folch, A., Costa, A., Scaini, C., and Dellino, P.: Hazard assessment of far-range volcanic ash dispersal from a violent Strombolian eruption at Somma-Vesuvius volcano, Naples, Italy: implications on civil aviation, *Bulletin of Volcanology*, 74, 2205–2218, <https://doi.org/10.1007/s00445-012-0656-3>, 2012.



- 755 Sulpizio, R., Zanchetta, G., Caron, B., Dellino, P., Mele, D., Giaccio, B., Insinga, D., Paterne, M., Siani, G., Costa, A., Macedonio, G., and Santacroce, R.: Volcanic ash hazard in the Central Mediterranean assessed from geological data, *Bulletin of Volcanology*, 76, <https://doi.org/10.1007/s00445-014-0866-y>, 2014.
- Suzuki, T.: A theoretical model for dispersion of tephra, *Arc Volcanism: Physics and Tectonics*, pp. 95–113, 1983.
- Swords-Daniels, V.: Living with Volcanic Risk: The consequences of, and Response to, ongoing volcanic ashfall from a social infrastructures  
760 systems perspective on Montserrat, *New Zealand Journal of Psychology*, 40, 2011.
- Tesche, M., Glantz, P., Johansson, C., Norman, M., Hiebsch, A., Ansmann, A., Althausen, A., Engelmann, R., and Seifert, P.: Volcanic ash over Scandinavia originating from the Grímsvo otn eruptions in May 2011, *Journal of Geophysical Research: Atmospheres*, 117, <https://doi.org/10.1029/2011JD017090>, 2012.
- Thompson, M. A. and Lindsay, Jan M. an Gaillard, J.: The influence of probabilistic volcanic hazard map properties on hazard communication,  
765 *Journal of applied Volcanology*, 4, <https://doi.org/10.1186/s13617-015-0023-0>, 2015.
- Titos, M., Martinez Montesinos, B., Barsotti, S., Sadri, L., Folch, A., Mingari, L., Macedonio, G., and Costa, A.: Long-term hazard assessment of explosive eruptions at Jan Mayen (Norway) and implications for air traffic in the North Atlantic, *Natural Hazards Earth System Sciences*, 22, 139–163, <https://doi.org/10.5194/nhess-22-139-2022>, 2022.
- Tonini, R., Sandri, L., and Thompson, M. A.: PyBethVH: A Python tool for probabilistic volcanic hazard assessment and for Generation of  
770 Bayesian hazard curves and maps, *Computers & Geosciences*, 79, 38–46, <https://doi.org/10.1016/j.cageo.2015.02.017>, 2015.
- Vezzoli, L. and Barberi, F.: Progetto finalizzato geodinamica: monografie finali. X: Island of Ischia, *Quaderni de la Ricerca Scientifica*, 1988.
- Wilson, G., Wilson, T. M., Deligne, N. I., and Cole, J. W.: Volcanic hazard impacts to critical infrastructures: A review, *Journal of Volcanology and Geothermal Research*, 286, 148–182, <https://doi.org/10.1016/j.jvolgeores.2014.08.030>, 2014.
- Wilson, T. M., Stewart, C., Sword-Daniels, V., Leonard, G. S., Johnston, D. M., Cole, J. W., Wardman, J., Wilson, G., and  
775 Bernard, S. T.: Volcanic ash impacts on critical infrastructures, *Physics and Chemistry of the Earth, Parts A/B/C*, 45-46, 5–23, <https://doi.org/10.1016/j.pce.2011.06.006>, 2012.
- Wilson, T. M., Deligne, N. I., Blake, D. M., and Cole, J. W.: Framework for developing volcanic fragility and vulnerability functions for critical infrastructures, *Journal of applied volcanology*, 6, 2017.
- Zuccaro, G., Leone, M. F., Del Cogliano, D., and Sgroi, A.: Economic impact of explosive volcanic eruptions: a simulation-based assessment  
780 model applied to Campania region volcanoes, *Journal of Volcanology and Geothermal Research*, 226, 1–15, 2013.
